# Supplementary material
Source: MDPI journal article supplement (https://www.mdpi.com/2227-9040/7/1/5)
Supplement: s1 [file s1]

*Electronic Supporting Information for*

**Fluorescence-Based Detection of Benzene, Toluene, Ethylbenzene,  
Xylene, and Cumene (BTEXC) Compounds in Fuel-Contaminated  
Snow Environments**

Dana J. DiScenza, Lauren E. Intravaia, Anna Healy, Sage B. Dubrawski, and Mindy Levine

## TABLE OF CONTENTS

|                                                                      |     |
|----------------------------------------------------------------------|-----|
| Summary Tables.....                                                  | S3  |
| Summary Table for GC-MS Characterization.....                        | S3  |
| Summary Tables for Fluorescence Modulation Experiments.....          | S4  |
| Summary Tables for Mixture Fluorescence Modulation Experiments.....  | S5  |
| Summary Tables for Limit of Detection Experiments.....               | S6  |
| Summary Tables for Array Generation Experiments.....                 | S7  |
| Summary Tables for Mixture Array Generation Experiments.....         | S9  |
| Summary Figures.....                                                 | S10 |
| Summary Figures for Fluorescence Modulation Experiments.....         | S10 |
| Summary Figures for Limit of Detection Experiments.....              | S21 |
| Summary Figures for Array Generation Experiments.....                | S32 |
| Summary Figures for Mixture Fluorescence Modulation Experiments..... | S34 |

## SUMMARY TABLES

### SUMMARY TABLE FOR GC-MS CHARACTERIZATION

**Table S1.** GC-MS results for snow samples.

| Snow       | Retention Time (min) | NIST Compound ID           |
|------------|----------------------|----------------------------|
| Newport    | 7.5                  | 4,5-dimethylhexene         |
|            | 15.4                 | 3-methylpentadecane        |
|            | 27.4                 | 9-octadecenamide           |
| Providence | 9.8                  | 2-trifluoroacetoxydodecane |
|            | 12.3                 | 2-methyldecane             |
|            | 15.3                 | 3,7-dimethyldecane         |
|            | 18.2                 | 2,3,3-trimethyloctane      |
|            | 18.6                 | isopropyl pentadecanoate   |
|            | 20.5                 | 6-propyltridecane          |
|            | 25.3                 | Octanamide                 |
|            | 27.0                 | 9-octadecenamide           |
| Kingston   | 7.5                  | 4-methylheptene            |
|            | 12.3                 | 2-methyldodecane           |
|            | 15.0                 | triacetin                  |
|            | 15.5                 | 2-methyltridecane          |
|            | 18.0                 | 2,3,5,8-tetramethyldecane  |
|            | 27.5                 | 9-octadecenamide           |

### SUMMARY TABLES FOR FLUORESCENCE MODULATION EXPERIMENTS

**Table S2.** Fluorescence modulation results for Newport snow.

| Analyte | $\beta$ -Cyclodextrin | Methyl- $\beta$ -Cyclodextrin | 2-Hydroxypropyl- $\beta$ -Cyclodextrin | Phosphate Buffered Saline |
|---------|-----------------------|-------------------------------|----------------------------------------|---------------------------|
| 1       | 1.10 $\pm$ 0.01       | 1.12 $\pm$ 0.00               | 1.10 $\pm$ 0.00                        | 1.10 $\pm$ 0.00           |
| 2       | 1.12 $\pm$ 0.01       | 1.08 $\pm$ 0.01               | 1.05 $\pm$ 0.00                        | 1.09 $\pm$ 0.00           |
| 3       | 1.10 $\pm$ 0.01       | 1.11 $\pm$ 0.01               | 1.13 $\pm$ 0.01                        | 1.84 $\pm$ 0.04           |
| 4       | 1.10 $\pm$ 0.01       | 1.05 $\pm$ 0.00               | 1.12 $\pm$ 0.01                        | 1.08 $\pm$ 0.00           |
| 5       | 1.08 $\pm$ 0.00       | 1.10 $\pm$ 0.00               | 1.11 $\pm$ 0.00                        | 1.09 $\pm$ 0.01           |
| 6       | 1.13 $\pm$ 0.00       | 1.09 $\pm$ 0.01               | 1.12 $\pm$ 0.00                        | 1.08 $\pm$ 0.00           |
| 7       | 1.11 $\pm$ 0.00       | 1.10 $\pm$ 0.00               | 1.11 $\pm$ 0.01                        | 1.11 $\pm$ 0.00           |
| 8       | 1.11 $\pm$ 0.00       | 1.11 $\pm$ 0.01               | 1.10 $\pm$ 0.01                        | 1.11 $\pm$ 0.00           |

**Table S3.** Fluorescence modulation results for Providence snow.

| Analyte | $\beta$ -Cyclodextrin | Methyl- $\beta$ -Cyclodextrin | 2-Hydroxypropyl- $\beta$ -Cyclodextrin | Phosphate Buffered Saline |
|---------|-----------------------|-------------------------------|----------------------------------------|---------------------------|
| 1       | 1.13 $\pm$ 0.01       | 1.09 $\pm$ 0.01               | 1.12 $\pm$ 0.02                        | 1.12 $\pm$ 0.00           |
| 2       | 1.10 $\pm$ 0.01       | 1.07 $\pm$ 0.00               | 1.08 $\pm$ 0.00                        | 1.09 $\pm$ 0.00           |
| 3       | 1.07 $\pm$ 0.00       | 1.10 $\pm$ 0.00               | 1.04 $\pm$ 0.00                        | 1.07 $\pm$ 0.00           |
| 4       | 1.08 $\pm$ 0.00       | 1.05 $\pm$ 0.00               | 1.05 $\pm$ 0.00                        | 1.08 $\pm$ 0.00           |
| 5       | 1.06 $\pm$ 0.00       | 1.07 $\pm$ 0.00               | 1.04 $\pm$ 0.00                        | 1.08 $\pm$ 0.00           |
| 6       | 1.08 $\pm$ 0.00       | 1.09 $\pm$ 0.01               | 1.04 $\pm$ 0.00                        | 1.06 $\pm$ 0.00           |
| 7       | 1.06 $\pm$ 0.00       | 1.11 $\pm$ 0.01               | 1.04 $\pm$ 0.00                        | 1.08 $\pm$ 0.00           |
| 8       | 1.08 $\pm$ 0.00       | 1.10 $\pm$ 0.00               | 1.04 $\pm$ 0.00                        | 1.06 $\pm$ 0.00           |

**Table S4.** Fluorescence modulation for Kingston snow.

| Analyte | $\beta$ -Cyclodextrin | Methyl- $\beta$ -Cyclodextrin | 2-Hydroxypropyl- $\beta$ -Cyclodextrin | Phosphate Buffered Saline |
|---------|-----------------------|-------------------------------|----------------------------------------|---------------------------|
| 1       | 1.13 $\pm$ 0.01       | 1.11 $\pm$ 0.01               | 1.08 $\pm$ 0.00                        | 1.14 $\pm$ 0.01           |
| 2       | 1.06 $\pm$ 0.00       | 1.06 $\pm$ 0.00               | 1.07 $\pm$ 0.00                        | 1.08 $\pm$ 0.00           |
| 3       | 1.12 $\pm$ 0.01       | 1.07 $\pm$ 0.00               | 1.09 $\pm$ 0.00                        | 1.13 $\pm$ 0.01           |
| 4       | 1.10 $\pm$ 0.01       | 1.07 $\pm$ 0.00               | 1.08 $\pm$ 0.01                        | 1.08 $\pm$ 0.00           |
| 5       | 1.04 $\pm$ 0.00       | 1.08 $\pm$ 0.01               | 1.02 $\pm$ 0.00                        | 1.10 $\pm$ 0.01           |
| 6       | 1.09 $\pm$ 0.00       | 1.07 $\pm$ 0.00               | 1.03 $\pm$ 0.00                        | 1.11 $\pm$ 0.01           |
| 7       | 1.09 $\pm$ 0.00       | 1.11 $\pm$ 0.01               | 1.10 $\pm$ 0.01                        | 1.11 $\pm$ 0.01           |
| 8       | 1.10 $\pm$ 0.00       | 1.10 $\pm$ 0.00               | 1.08 $\pm$ 0.00                        | 1.14 $\pm$ 0.01           |

**Table S5.** Fluorescence modulation for DI water.

| Analyte | $\beta$ -Cyclodextrin | Methyl- $\beta$ -Cyclodextrin | 2-Hydroxypropyl- $\beta$ -Cyclodextrin | Phosphate Buffered Saline |
|---------|-----------------------|-------------------------------|----------------------------------------|---------------------------|
| 1       | 1.06 $\pm$ 0.00       | 1.08 $\pm$ 0.00               | 1.06 $\pm$ 0.02                        | 1.11 $\pm$ 0.00           |
| 2       | 1.05 $\pm$ 0.01       | 1.06 $\pm$ 0.00               | 1.06 $\pm$ 0.01                        | 1.08 $\pm$ 0.01           |
| 3       | 1.05 $\pm$ 0.00       | 1.05 $\pm$ 0.01               | 1.07 $\pm$ 0.00                        | 1.09 $\pm$ 0.00           |
| 4       | 1.05 $\pm$ 0.01       | 1.05 $\pm$ 0.00               | 1.04 $\pm$ 0.00                        | 1.09 $\pm$ 0.00           |
| 5       | 1.06 $\pm$ 0.01       | 1.04 $\pm$ 0.01               | 1.06 $\pm$ 0.00                        | 1.06 $\pm$ 0.00           |
| 6       | 1.05 $\pm$ 0.01       | 1.05 $\pm$ 0.00               | 1.06 $\pm$ 0.00                        | 1.10 $\pm$ 0.00           |
| 7       | 1.05 $\pm$ 0.00       | 1.04 $\pm$ 0.01               | 1.07 $\pm$ 0.00                        | 1.08 $\pm$ 0.00           |
| 8       | 1.08 $\pm$ 0.01       | 1.05 $\pm$ 0.00               | 1.06 $\pm$ 0.00                        | 1.09 $\pm$ 0.00           |

## SUMMARY TABLES FOR MIXTURE FLUORESCENCE MODULATION EXPERIMENTS

**Table S6.** Fluorescence modulation for analyte mixtures in Kingston snow.

| Analyte Mixture                   | $\beta$ -cyclodextrin | Methyl- $\beta$ -cyclodextrin | 2-Hydroxypropyl- $\beta$ -cyclodextrin | Phosphate Buffered Saline |
|-----------------------------------|-----------------------|-------------------------------|----------------------------------------|---------------------------|
| Analyte 4 + Analyte 5             | 0.82 $\pm$ 0.01       | 1.32 $\pm$ 0.01               | 1.16 $\pm$ 0.03                        | 1.15 $\pm$ 0.01           |
| Analyte 4 + Analyte 6             | 1.20 $\pm$ 0.02       | 1.10 $\pm$ 0.00               | 1.31 $\pm$ 0.03                        | 1.10 $\pm$ 0.00           |
| Analyte 5 + Analyte 6             | 0.87 $\pm$ 0.01       | 1.08 $\pm$ 0.01               | 1.38 $\pm$ 0.04                        | 1.13 $\pm$ 0.01           |
| Analyte 4 + Analyte 5 + Analyte 6 | 1.15 $\pm$ 0.00       | 1.08 $\pm$ 0.01               | 1.29 $\pm$ 0.01                        | 1.16 $\pm$ 0.01           |

**Table S7.** Fluorescence modulation for analyte mixtures in DI water.

| Analyte Mixture                   | $\beta$ -cyclodextrin | Methyl- $\beta$ -cyclodextrin | 2-Hydroxypropyl- $\beta$ -cyclodextrin | Phosphate Buffered Saline |
|-----------------------------------|-----------------------|-------------------------------|----------------------------------------|---------------------------|
| Analyte 4 + Analyte 5             | 1.08 $\pm$ 0.01       | 1.02 $\pm$ 0.03               | 1.18 $\pm$ 0.01                        | 1.18 $\pm$ 0.01           |
| Analyte 4 + Analyte 6             | 1.17 $\pm$ 0.04       | 1.08 $\pm$ 0.03               | 1.16 $\pm$ 0.02                        | 1.13 $\pm$ .02            |
| Analyte 5 + Analyte 6             | 1.19 $\pm$ 0.02       | 1.16 $\pm$ 0.04               | 1.21 $\pm$ 0.02                        | 1.23 $\pm$ 0.01           |
| Analyte 4 + Analyte 5 + Analyte 6 | 1.21 $\pm$ 0.03       | 1.14 $\pm$ 0.03               | 1.22 $\pm$ 0.02                        | 1.21 $\pm$ 0.02           |

## SUMMARY TABLES FOR LIMIT OF DETECTION EXPERIMENTS

**Table S8.** Limits of detection for analytes with fluorophore **9** and methyl- $\beta$ -cyclodextrin in Newport snow.

| Analyte | Equation               | R <sup>2</sup> | LOD ( $\mu$ M)   |
|---------|------------------------|----------------|------------------|
| 1       | $y = 0.0004x + 1.053$  | 0.8983         | $63.03 \pm 1.42$ |
| 2       | $y = 0.0002x + 1.0135$ | 0.9323         | $58.10 \pm 4.41$ |
| 3       | $y = 0.0009x + 1.0054$ | 0.9857         | $4.02 \pm 0.07$  |
| 4       | $y = 0.0005x + 1.0286$ | 0.7431         | $14.85 \pm 0.41$ |
| 5       | $y = 0.0011x + 0.9634$ | 0.9033         | $7.60 \pm 0.25$  |
| 6       | $y = 0.0002x + 1.019$  | 0.9388         | $30.8 \pm 14.90$ |
| 7       | $y = 0.0003x + 1.0073$ | 0.3053         | <i>a</i>         |

<sup>a</sup> Non-linear values were obtained

**Table S9.** Limits of detection for analytes with fluorophore **9** and methyl- $\beta$ -cyclodextrin in Providence snow.

| Analyte | Equation               | R <sup>2</sup> | LOD ( $\mu$ M)   |
|---------|------------------------|----------------|------------------|
| 1       | $y = 0.0007x + 1.0329$ | 0.9221         | $8.33 \pm 0.42$  |
| 2       | $y = 0.0003x + 1.0201$ | 0.9983         | $16.26 \pm 0.62$ |
| 3       | $y = 0.0005x + 1.014$  | 0.9371         | $12.52 \pm 1.39$ |
| 4       | $y = 0.0007x + 0.9896$ | 0.9641         | $7.52 \pm 0.25$  |
| 5       | $y = 0.0009x + 0.9523$ | 0.9929         | $22.15 \pm 4.46$ |
| 6       | $y = 0.0008x + 0.9354$ | 0.9528         | $34.40 \pm 5.79$ |
| 7       | $y = 0.0007x + 1.0285$ | 0.9228         | $7.21 \pm 0.29$  |

**Table S10.** Limits of detection for analytes with fluorophore **9** and methyl- $\beta$ -cyclodextrin in Kingston snow.

| Analyte | Equation                | R <sup>2</sup> | LOD ( $\mu$ M)   |
|---------|-------------------------|----------------|------------------|
| 1       | $y = 0.0003x + 1.061$   | 0.5459         | $56.57 \pm 4.96$ |
| 2       | $y = 0.0005x + 1.0254$  | 0.9143         | $6.12 \pm 0.51$  |
| 3       | $y = 0.0009x + 1.0465$  | 0.8719         | $22.14 \pm 0.99$ |
| 4       | $y = 0.0005x + 1.0403$  | 0.7831         | $19.62 \pm 2.13$ |
| 5       | $y = -0.0004x + 1.0509$ | 0.7656         | <i>a</i>         |
| 6       | $y = 0.0007x + 1.0113$  | 0.8469         | $20.87 \pm 4.19$ |
| 7       | $y = 0.0001x + 0.9847$  | 0.2607         | <i>a</i>         |

<sup>a</sup> Non-linear values were obtained.

## SUMMARY TABLES FOR ARRAY GENERATION EXPERIMENTS

**Table S11.** Results of array generation in Newport snow.

### Jackknifed Classification Matrix

|           | Analyte 1 | Analyte 2 | Analyte 3 | Analyte 4 | Analyte 5 | Analyte 6 | Analyte 7 | Analyte 8 | %correct |
|-----------|-----------|-----------|-----------|-----------|-----------|-----------|-----------|-----------|----------|
| Analyte 1 | 4         | 0         | 0         | 0         | 0         | 0         | 0         | 0         | 100      |
| Analyte 2 | 0         | 4         | 0         | 0         | 0         | 0         | 0         | 0         | 100      |
| Analyte 3 | 0         | 0         | 4         | 0         | 0         | 0         | 0         | 0         | 100      |
| Analyte 4 | 0         | 0         | 0         | 4         | 0         | 0         | 0         | 0         | 100      |
| Analyte 5 | 0         | 0         | 0         | 0         | 4         | 0         | 0         | 0         | 100      |
| Analyte 6 | 0         | 0         | 0         | 0         | 0         | 4         | 0         | 0         | 100      |
| Analyte 7 | 0         | 0         | 0         | 0         | 0         | 0         | 4         | 0         | 100      |
| Analyte 8 | 0         | 0         | 0         | 0         | 0         | 0         | 0         | 4         | 100      |
| Total     | 4         | 4         | 4         | 4         | 4         | 4         | 4         | 4         | 100      |

### Cumulative Proportion of Total Dispersion

|       |       |       |
|-------|-------|-------|
| 0.752 | 0.933 | 1.000 |
|-------|-------|-------|

**Table S12.** Results of array generation in Providence snow.

### Jackknifed Classification Matrix

|           | Analyte 1 | Analyte 2 | Analyte 3 | Analyte 4 | Analyte 5 | Analyte 6 | Analyte 7 | Analyte 8 | %correct |
|-----------|-----------|-----------|-----------|-----------|-----------|-----------|-----------|-----------|----------|
| Analyte 1 | 4         | 0         | 0         | 0         | 0         | 0         | 0         | 0         | 100      |
| Analyte 2 | 0         | 4         | 0         | 0         | 0         | 0         | 0         | 0         | 100      |
| Analyte 3 | 0         | 0         | 4         | 0         | 0         | 0         | 0         | 0         | 100      |
| Analyte 4 | 0         | 0         | 0         | 4         | 0         | 0         | 0         | 0         | 100      |
| Analyte 5 | 0         | 0         | 0         | 0         | 4         | 0         | 0         | 0         | 100      |
| Analyte 6 | 0         | 0         | 0         | 0         | 0         | 4         | 0         | 0         | 100      |
| Analyte 7 | 0         | 0         | 0         | 0         | 0         | 0         | 4         | 0         | 100      |
| Analyte 8 | 0         | 0         | 0         | 0         | 0         | 0         | 0         | 4         | 100      |
| Total     | 4         | 4         | 4         | 4         | 4         | 4         | 4         | 4         | 100      |

### Cumulative Proportion of Total Dispersion

|       |       |       |
|-------|-------|-------|
| 0.855 | 0.978 | 1.000 |
|-------|-------|-------|

**Table S13.** Results of array generation in Kingston snow.

### Jackknifed Classification Matrix

|           | Analyte 1 | Analyte 2 | Analyte 3 | Analyte 4 | Analyte 5 | Analyte 6 | Analyte 7 | Analyte 8 | %correct |
|-----------|-----------|-----------|-----------|-----------|-----------|-----------|-----------|-----------|----------|
| Analyte 1 | 4         | 0         | 0         | 0         | 0         | 0         | 0         | 0         | 100      |
| Analyte 2 | 0         | 4         | 0         | 0         | 0         | 0         | 0         | 0         | 100      |
| Analyte 3 | 0         | 0         | 4         | 0         | 0         | 0         | 0         | 0         | 100      |
| Analyte 4 | 0         | 0         | 0         | 4         | 0         | 0         | 0         | 0         | 100      |
| Analyte 5 | 0         | 0         | 0         | 0         | 4         | 0         | 0         | 0         | 100      |
| Analyte 6 | 0         | 0         | 0         | 0         | 0         | 4         | 0         | 0         | 100      |
| Analyte 7 | 0         | 0         | 0         | 0         | 0         | 0         | 4         | 0         | 100      |
| Analyte 8 | 0         | 0         | 0         | 0         | 0         | 0         | 0         | 4         | 100      |
| Total     | 4         | 4         | 4         | 4         | 4         | 4         | 4         | 4         | 100      |

### Cumulative Proportion of Total Dispersion

|       |       |       |
|-------|-------|-------|
| 0.770 | 0.988 | 1.000 |
|-------|-------|-------|

**Table S14.** Results of array generation in DI water.

**Jackknifed Classification Matrix**

|           | Analyte 1 | Analyte 2 | Analyte 3 | Analyte 4 | Analyte 5 | Analyte 6 | Analyte 7 | Analyte 8 | %correct |
|-----------|-----------|-----------|-----------|-----------|-----------|-----------|-----------|-----------|----------|
| Analyte 1 | 4         | 0         | 0         | 0         | 0         | 0         | 0         | 0         | 100      |
| Analyte 2 | 0         | 4         | 0         | 0         | 0         | 0         | 0         | 0         | 100      |
| Analyte 3 | 0         | 0         | 4         | 0         | 0         | 0         | 0         | 0         | 100      |
| Analyte 4 | 0         | 0         | 0         | 4         | 0         | 0         | 0         | 0         | 100      |
| Analyte 5 | 0         | 0         | 0         | 0         | 4         | 0         | 0         | 0         | 100      |
| Analyte 6 | 0         | 0         | 0         | 0         | 0         | 4         | 0         | 0         | 100      |
| Analyte 7 | 0         | 0         | 1         | 0         | 0         | 1         | 2         | 0         | 50       |
| Analyte 8 | 0         | 0         | 0         | 0         | 0         | 0         | 0         | 4         | 100      |
| Total     | 4         | 4         | 5         | 4         | 4         | 5         | 2         | 4         | 94       |

**Cumulative Proportion of Total Dispersion**

|       |       |       |
|-------|-------|-------|
| 0.500 | 0.945 | 1.000 |
|-------|-------|-------|

**SUMMARY TABLES FOR MIXTURE ARRAY GENERATION EXPERIMENTS**

**Table S15.** Results of array generation for analyte mixtures in Kingston snow

**Jackknifed Classification Matrix**

|                         | Analyte 4 | Analyte 4 +<br>Analyte 5 | Analyte 4 +<br>Analyte 5 + | Analyte 4 +<br>Analyte 6 | Analyte 5 | Analyte 5 +<br>Analyte 6 | Analyte 6 | %correct |
|-------------------------|-----------|--------------------------|----------------------------|--------------------------|-----------|--------------------------|-----------|----------|
| Analyte 4               | 4         | 0                        | 0                          | 0                        | 0         | 0                        | 0         | 100      |
| Analyte 4 + Analyte 5   | 0         | 4                        | 0                          | 0                        | 0         | 0                        | 0         | 100      |
| Analyte 4 + Analyte 5 + | 0         | 0                        | 4                          | 0                        | 0         | 0                        | 0         | 100      |
| Analyte 4 + Analyte 6   | 0         | 0                        | 0                          | 4                        | 0         | 0                        | 0         | 100      |
| Analyte 5               | 0         | 0                        | 0                          | 0                        | 4         | 0                        | 0         | 100      |
| Analyte 5 + Analyte 6   | 0         | 0                        | 0                          | 0                        | 0         | 4                        | 0         | 100      |
| Analyte 6               | 0         | 0                        | 0                          | 0                        | 0         | 0                        | 4         | 100      |
| Total                   | 4         | 4                        | 4                          | 4                        | 4         | 4                        | 4         | 100      |

**Cumulative Proportion of Total Dispersion**

|       |       |       |       |
|-------|-------|-------|-------|
| 0.797 | 0.940 | 0.999 | 1.000 |
|-------|-------|-------|-------|

**Table S16.** Results of array generation for analyte mixtures in DI water

**Jackknifed Classification Matrix**

|                         | Analyte 4 | Analyte 4 +<br>Analyte 5 | Analyte 4 +<br>Analyte 5 + | Analyte 4 +<br>Analyte 6 | Analyte 5 | Analyte 5 +<br>Analyte 6 | Analyte 6 | %correct |
|-------------------------|-----------|--------------------------|----------------------------|--------------------------|-----------|--------------------------|-----------|----------|
| Analyte 4               | 4         | 0                        | 0                          | 0                        | 0         | 0                        | 0         | 100      |
| Analyte 4 + Analyte 5   | 0         | 4                        | 0                          | 0                        | 0         | 0                        | 0         | 100      |
| Analyte 4 + Analyte 5 + | 0         | 0                        | 4                          | 0                        | 0         | 0                        | 0         | 100      |
| Analyte 4 + Analyte 6   | 0         | 0                        | 0                          | 4                        | 0         | 0                        | 0         | 100      |
| Analyte 5               | 0         | 0                        | 0                          | 0                        | 4         | 0                        | 0         | 100      |
| Analyte 5 + Analyte 6   | 0         | 0                        | 0                          | 0                        | 0         | 4                        | 0         | 100      |
| Analyte 6               | 0         | 0                        | 0                          | 0                        | 0         | 0                        | 4         | 100      |
| Total                   | 4         | 4                        | 4                          | 4                        | 4         | 4                        | 4         | 100      |

**Cumulative Proportion of Total Dispersion**

|       |       |       |       |
|-------|-------|-------|-------|
| 0.774 | 0.981 | 0.999 | 1.000 |
|-------|-------|-------|-------|

## SUMMARY FIGURES

### SUMMARY FIGURES FOR FLUORESCENCE MODULATION EXPERIMENTS

The black line represents the emission from the fluorophore, and the red line represents the emission from the analyte and fluorophore mixed together in the different snow melt samples, both with 460 nm excitation. All X-axes measure the emission from 470 nm to 800 nm, and all the Y-axes have been normalized so that the fluorescence emission is on a scale of 0.0 to 1.0.

#### Newport Snow

##### Analyte 1- Newport

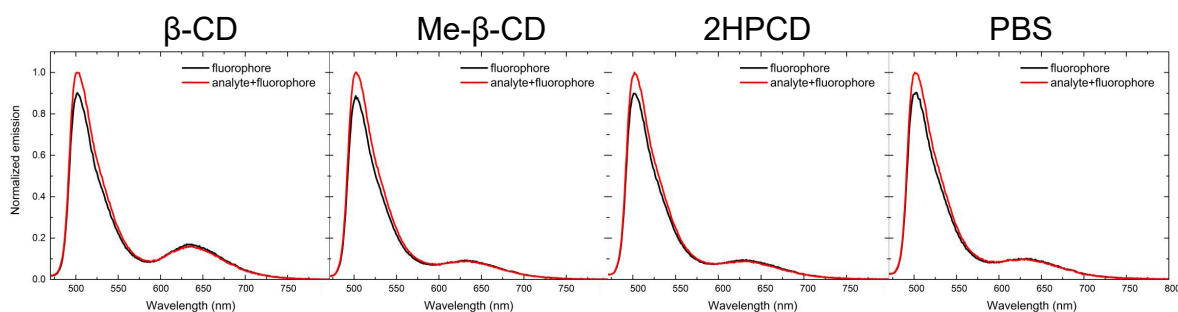

**Figure S1.** Fluorescence modulation of fluorophore 9 with analyte 1 in Newport snow.

##### Analyte 2 – Newport

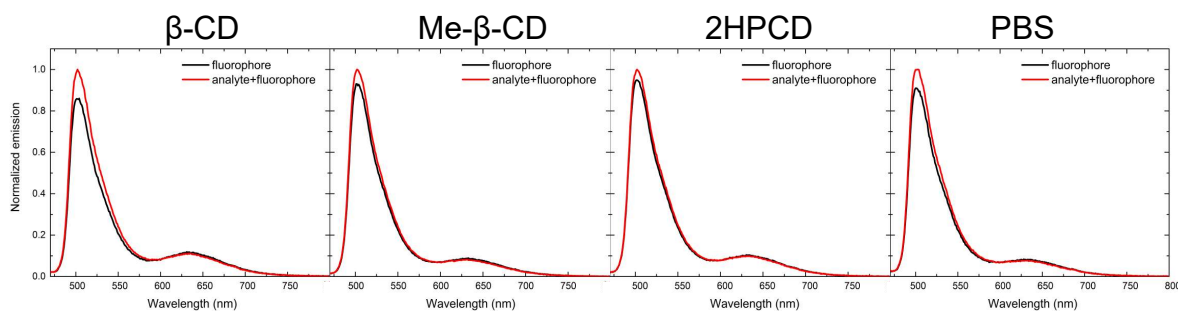

**Figure S2.** Fluorescence modulation of fluorophore 9 with analyte 2 in Newport snow.

##### Analyte 3 – Newport

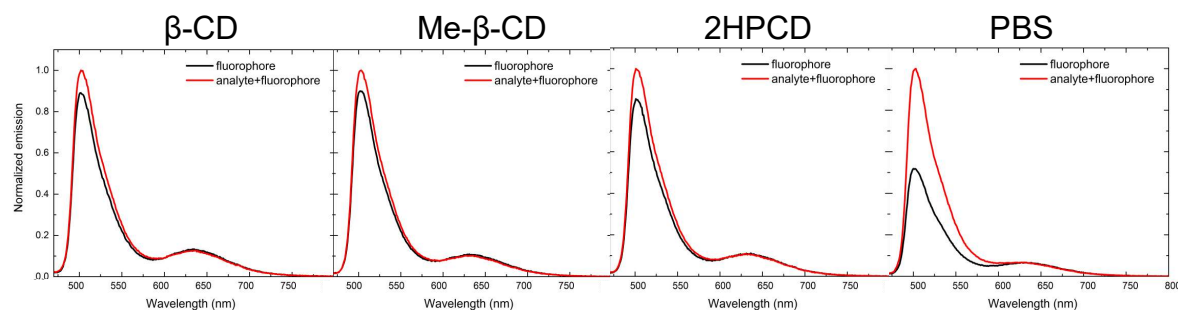

**Figure S3:** Fluorescence modulation of fluorophore 9 with analyte 3 in Newport snow



#### Analyte 4 – Newport

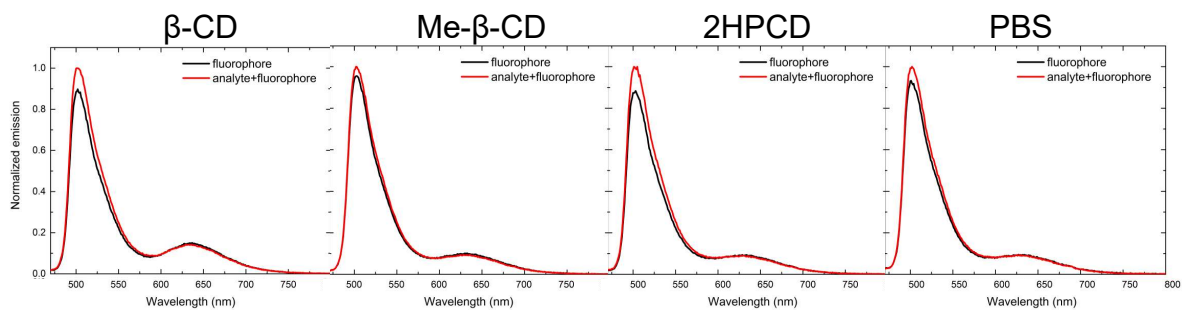

**Figure S4:** Fluorescence modulation of fluorophore 9 with analyte 4 in Newport snow

#### Analyte 5 – Newport

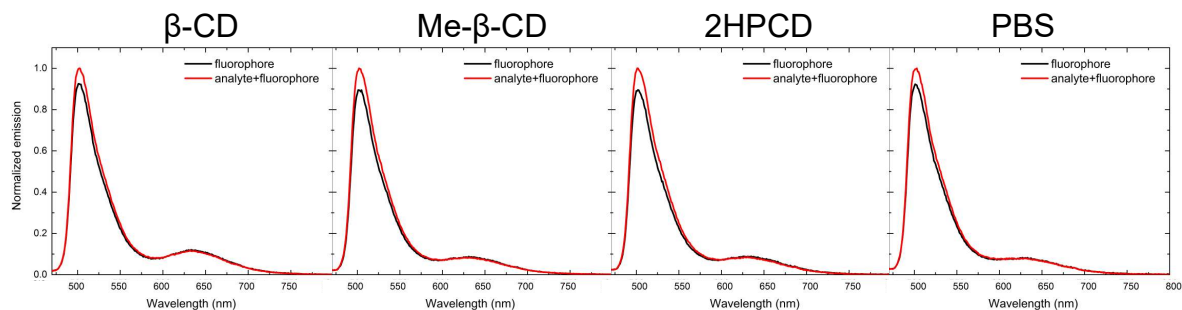

**Figure S5:** Fluorescence modulation of fluorophore 9 with analyte 5 in Newport snow

#### Analyte 6 – Newport

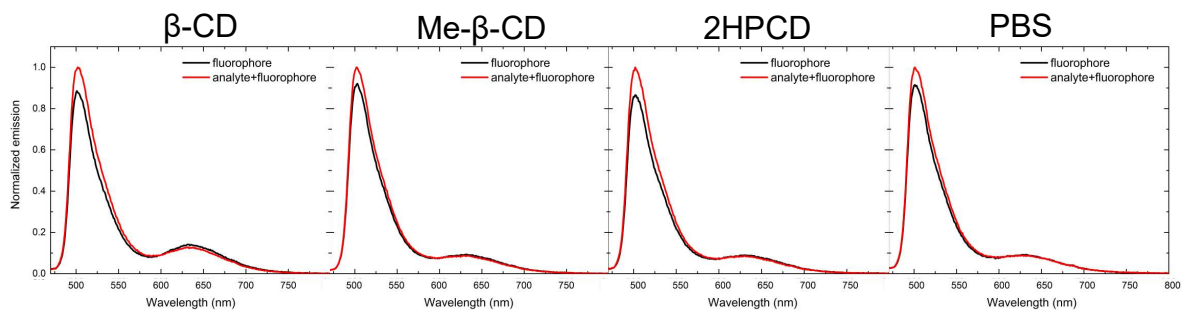

**Figure S6:** Fluorescence modulation of fluorophore 9 with analyte 6 in Newport snow

Analyte 7 – Newport

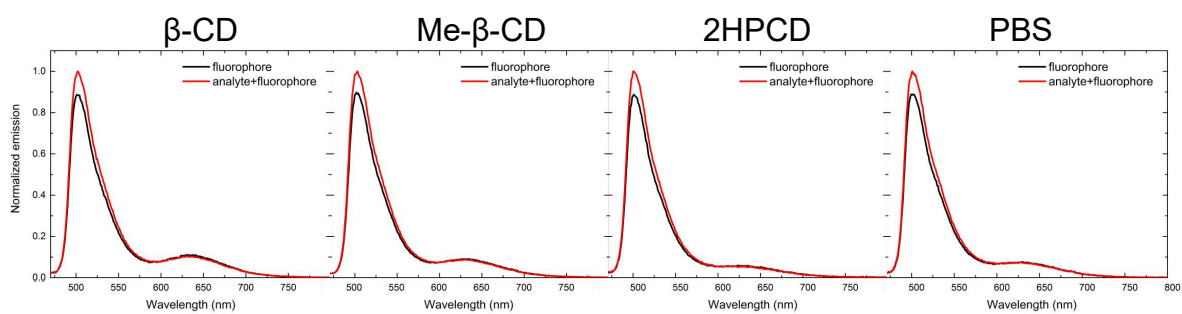

**Figure S7:** Fluorescence modulation of fluorophore 9 with analyte 7 in Newport snow

Analyte 8 – Newport

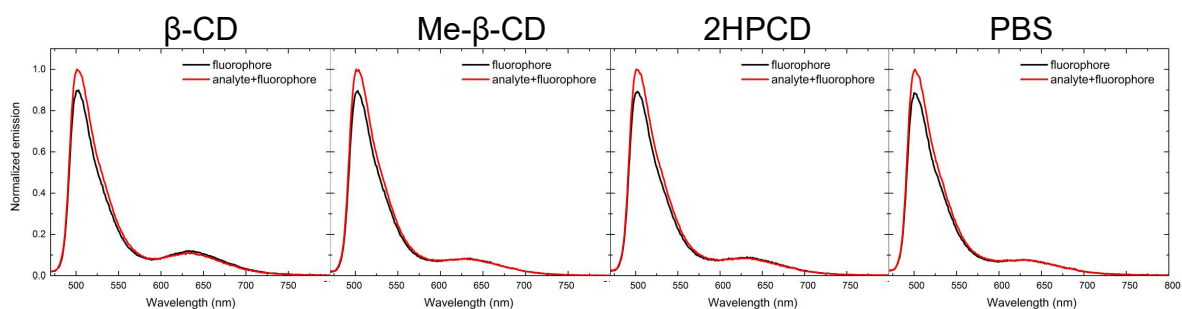

**Figure S8:** Fluorescence modulation of fluorophore 9 with control analyte 8 in Newport snow

Analyte 1 – Providence

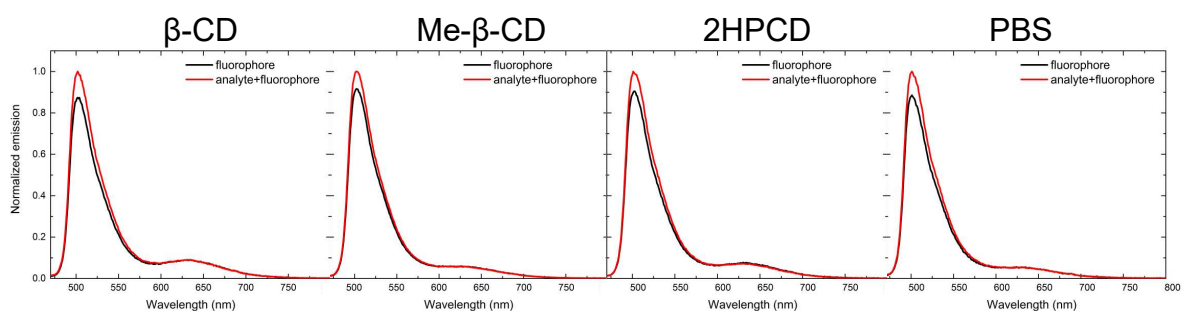

**Figure S9:** Fluorescence modulation of fluorophore 9 with analyte 1 in Providence snow

## Analyte 2 – Providence

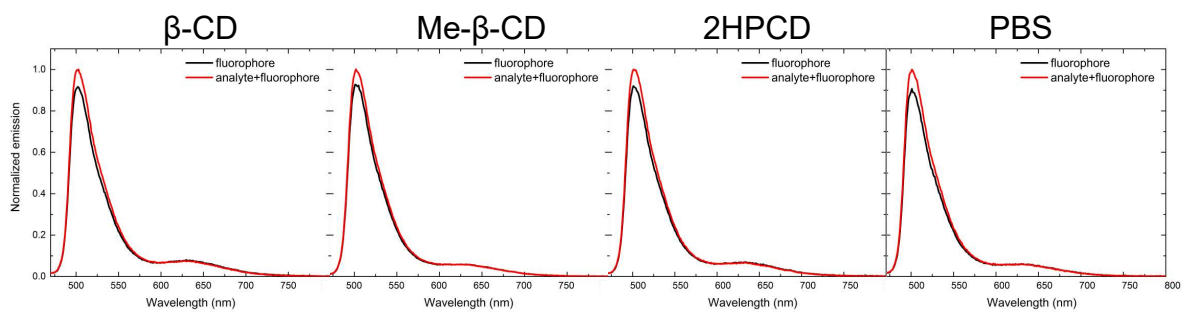

**Figure S10:** Fluorescence modulation of fluorophore 9 with analyte 2 in Providence snow

## Analyte 3 – Providence

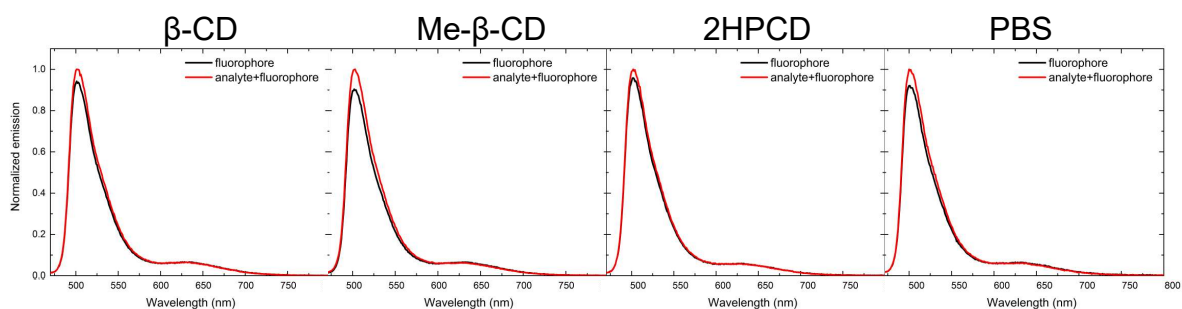

**Figure S11:** Fluorescence modulation of fluorophore 9 with analyte 3 in Providence snow

## Analyte 4 – Providence

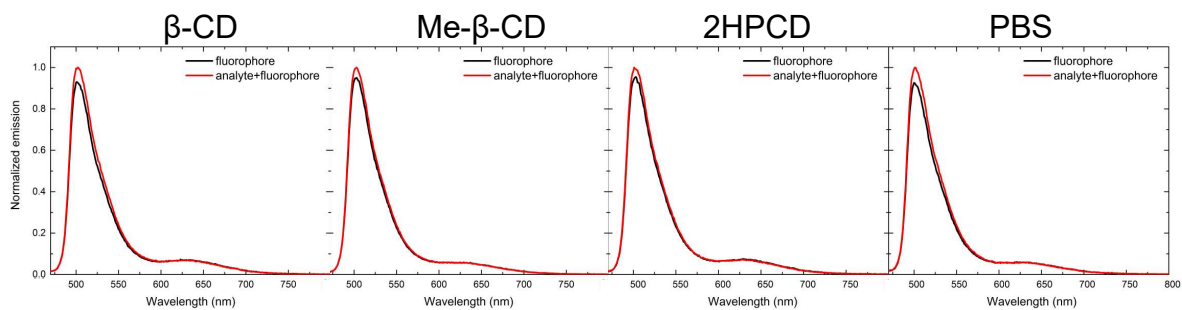

**Figure S12:** Fluorescence modulation of fluorophore 9 with analyte 4 in Providence snow

### Analyte 5 – Providence

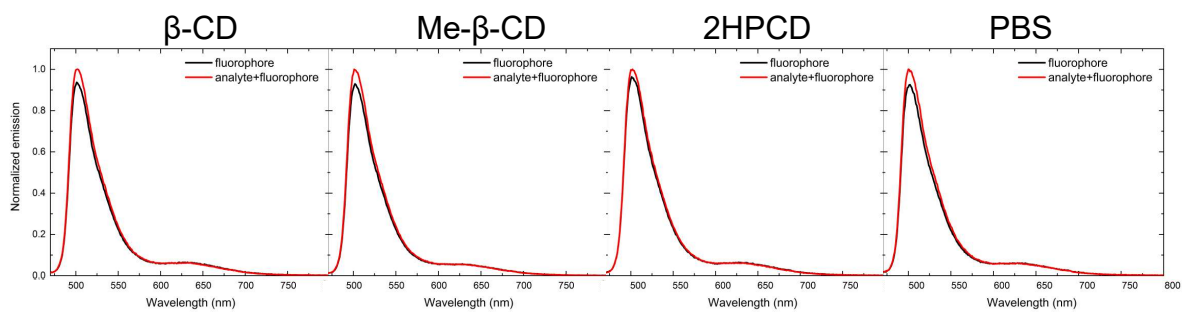

**Figure S13:** Fluorescence modulation of fluorophore 9 with analyte 5 in Providence snow

### Analyte 6 – Providence

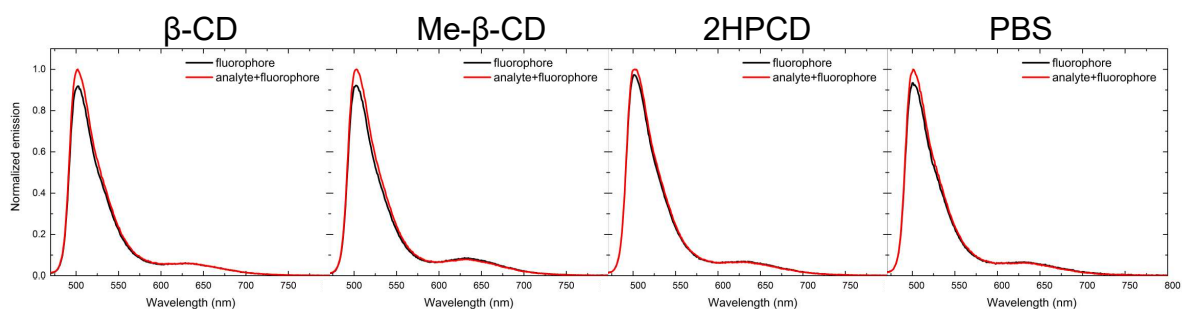

**Figure S14:** Fluorescence modulation of fluorophore 9 with analyte 6 in Providence snow

### Analyte 7 – Providence

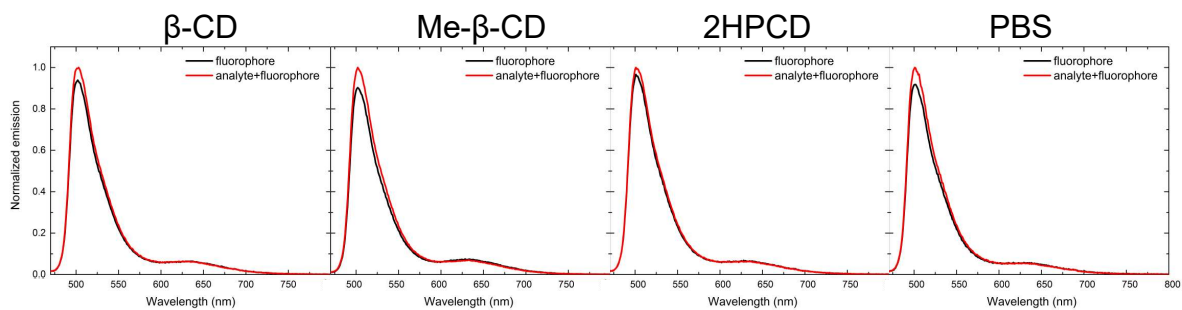

**Figure S15:** Fluorescence modulation of fluorophore 9 with analyte 7 in Providence snow

## Analyte 8 – Providence

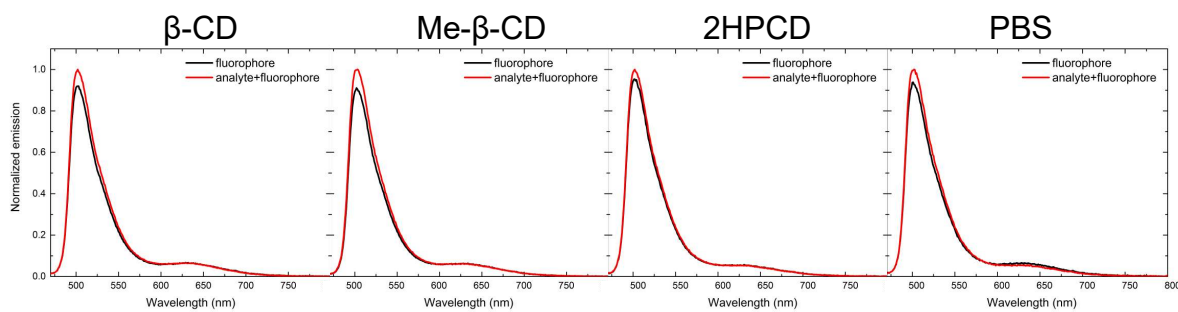

**Figure S16:** Fluorescence modulation of fluorophore 9 with control analyte 8 in Providence snow

## Kingston Snow

### Analyte 1 – Kingston

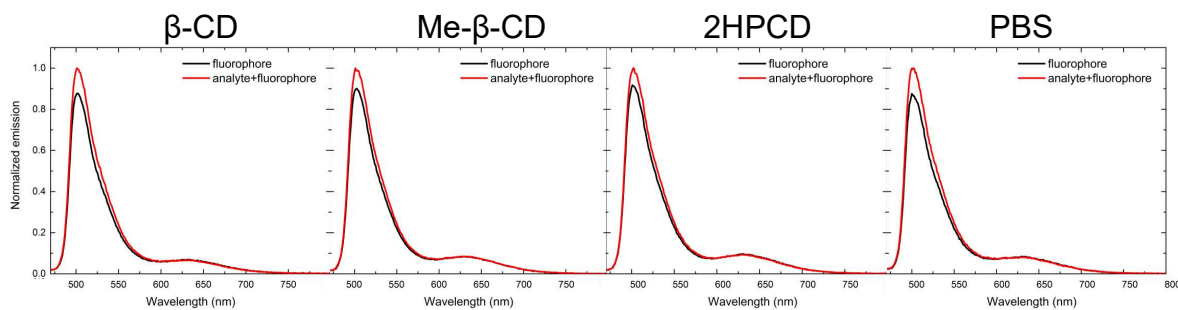

**Figure S17:** Fluorescence modulation of fluorophore 9 with analyte 1 in Kingston snow

### Analyte 2 – Kingston

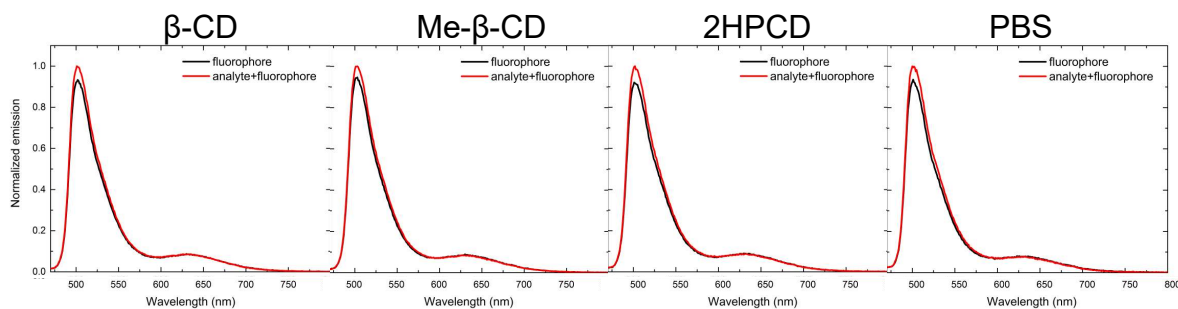

**Figure S18:** Fluorescence modulation of fluorophore 9 with analyte 2 in Kingston snow

Analyte 3 – Kingston

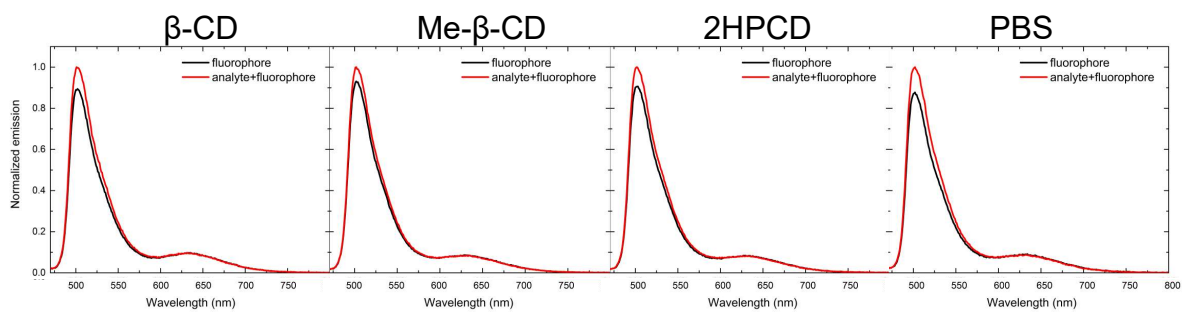

**Figure S19:** Fluorescence modulation of fluorophore 9 with analyte 3 in Kingston snow

Analyte 4 – Kingston

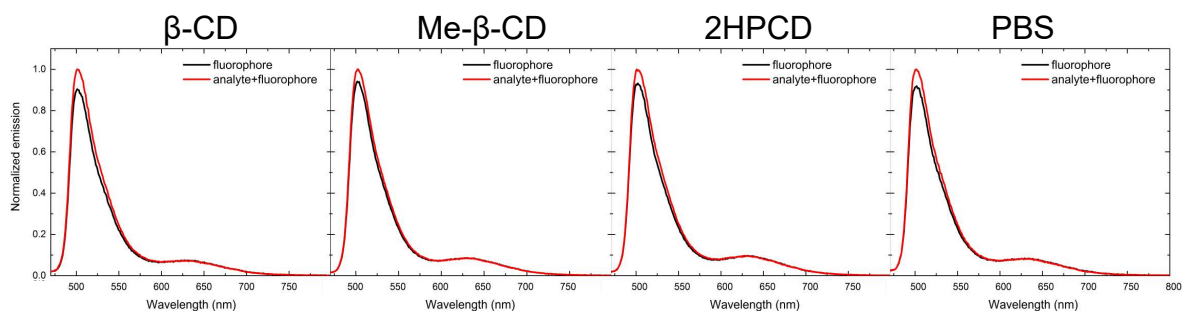

**Figure S20:** Fluorescence modulation of fluorophore 9 with analyte 4 in Kingston snow

Analyte 5 – Kingston

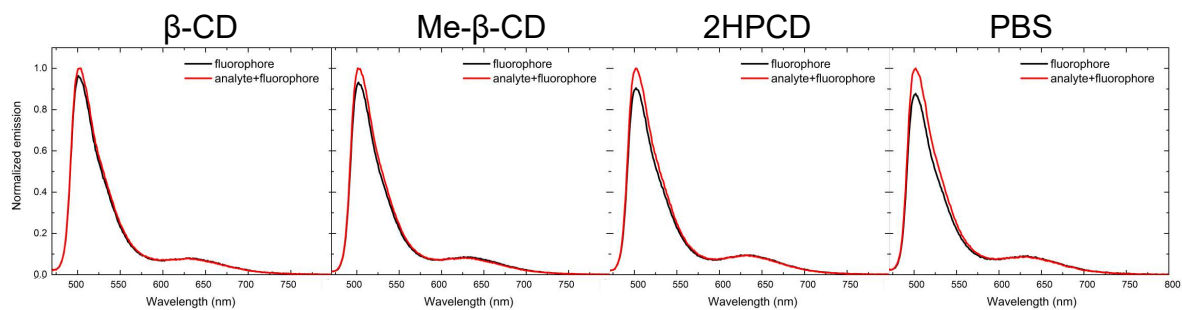

**Figure S21:** Fluorescence modulation of fluorophore 9 with analyte 5 in Kingston snow

Analyte 6 – Kingston

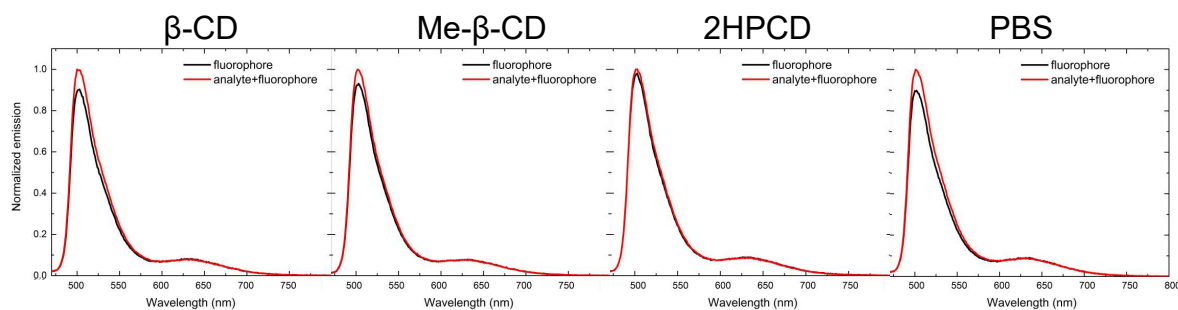

**Figure S22:** Fluorescence modulation of fluorophore 9 with analyte 6 in Kingston snow

Analyte 7 – Kingston

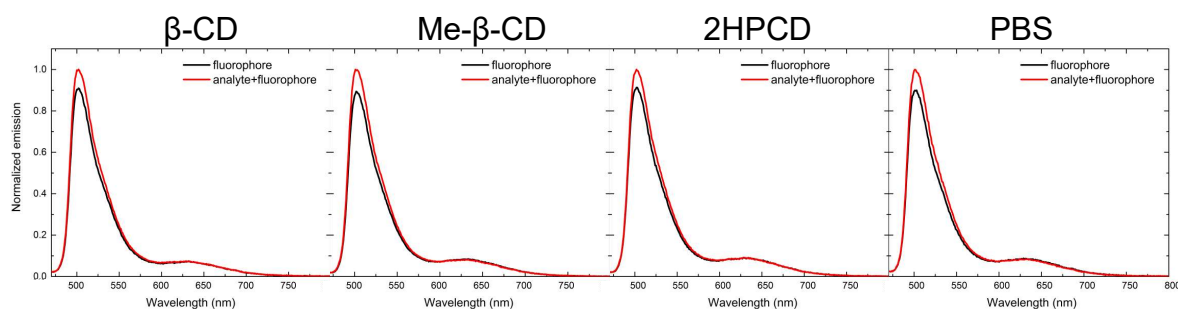

**Figure S23:** Fluorescence modulation of fluorophore 9 with analyte 7 in Kingston snow

Analyte 8 – Kingston

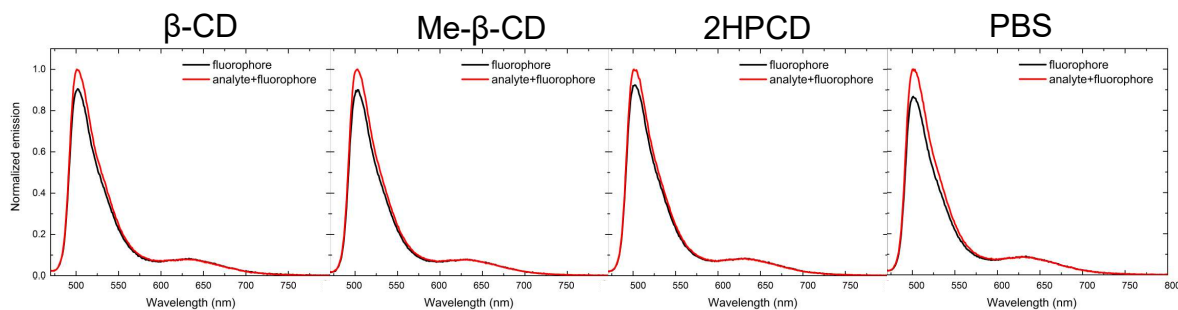

**Figure S24:** Fluorescence modulation of fluorophore 9 with control analyte 8 in Kingston snow

## DI Water

### Analyte 1 – DI Water

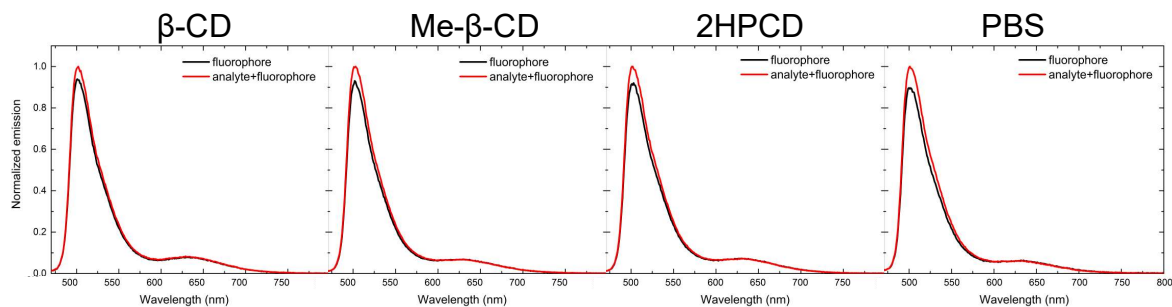

**Figure S25:** Fluorescence modulation of fluorophore **9** with analyte **1** in DI water

### Analyte 2 – DI Water

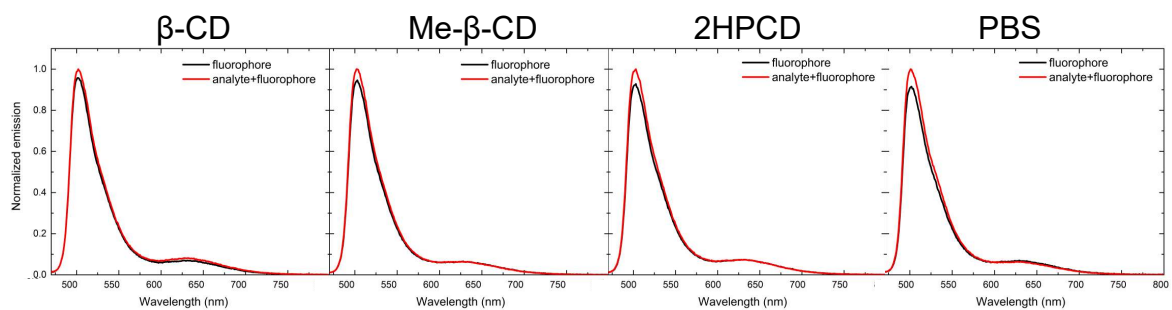

**Figure S26:** Fluorescence modulation of fluorophore **9** with analyte **2** in DI water

### Analyte 3 – DI Water

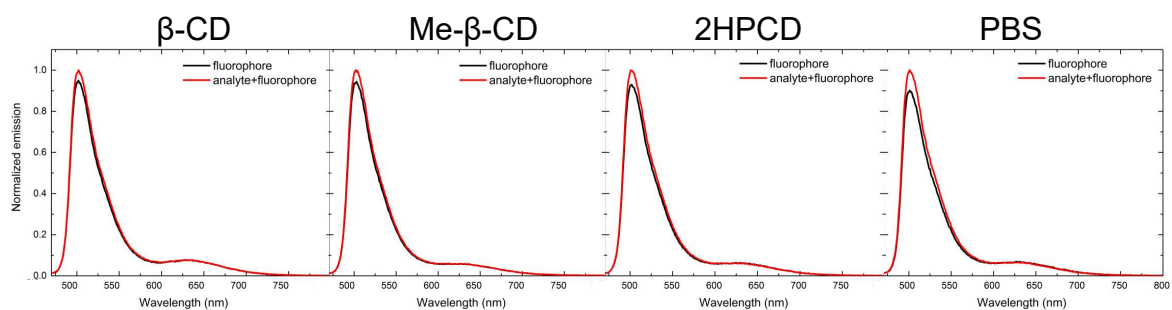

**Figure S27:** Fluorescence modulation of fluorophore **9** with analyte **3** in DI water



Analyte 4 – DI Water

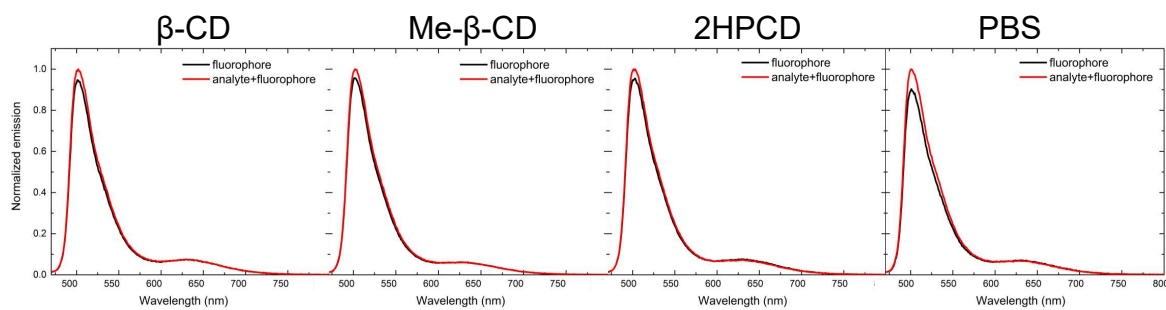

**Figure S28:** Fluorescence modulation of fluorophore 9 with analyte 4 in DI water

Analyte 5 – DI Water

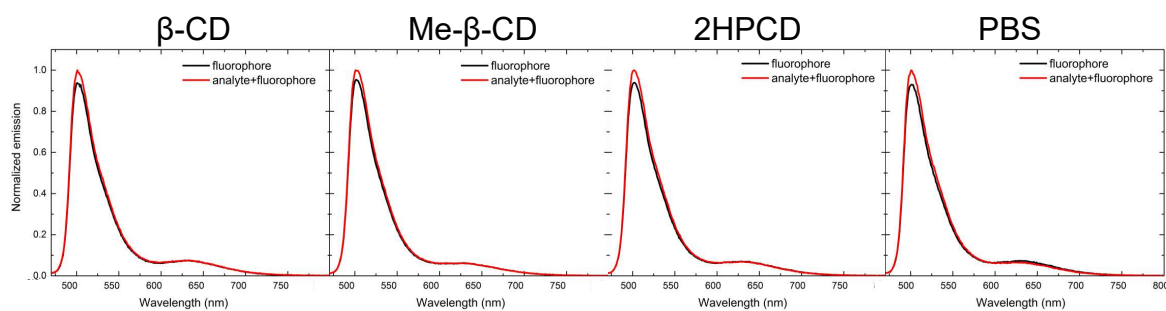

**Figure S29:** Fluorescence modulation of fluorophore 9 with analyte 5 in DI water

Analyte 6 – DI Water

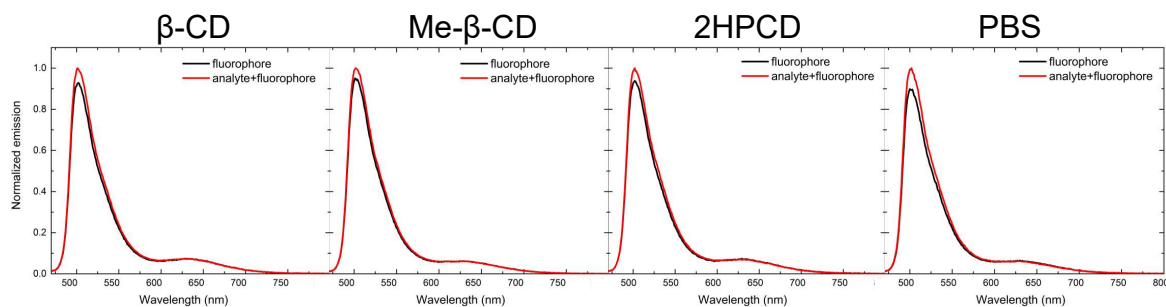

**Figure S30:** Fluorescence modulation of fluorophore 9 with analyte 6 in DI water

Analyte 7 – DI Water

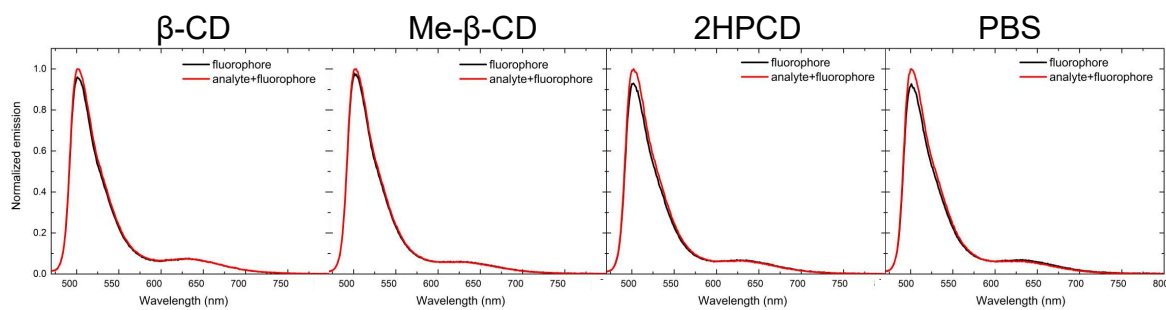

**Figure S31:** Fluorescence modulation of fluorophore 9 with analyte 7 in DI water

Analyte 8 – DI Water

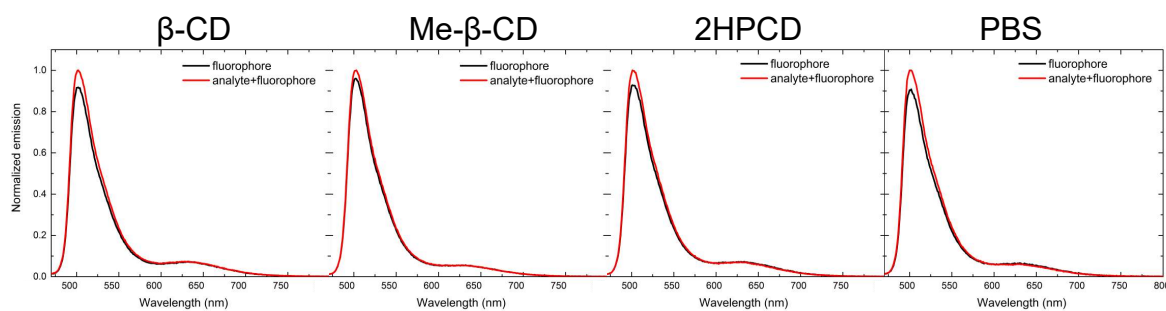

**Figure S32:** Fluorescence modulation of fluorophore 9 with control analyte 8 in DI water

## SUMMARY FIGURES FOR LIMIT OF DETECTION EXPERIMENTS

Limits of detection were calculated following literature-reported procedures:

Cheng, D.; Zhao, W.; Yang, H.; Huang, Z.; Liu, X.; Han, A. Detection of  $\text{Hg}^{2+}$  by a FRET ratiometric fluorescent probe based on a novel BODIPY-RhB system. *Tetrahedron Lett.* **2016**, 57, 2655-2659.

Plots were generated with the ratio of  $Fl_{\text{analyte}}/Fl_{\text{blank}}$  on the Y-axis and analyte concentration in micromolar on the X-axis.

In cases where the slope was negative, we used the absolute values to calculate the limit of detection. Fluorescence modulation is not always an increase in fluorescence emission, it can also appear as a decrease in fluorescence emission with analyte addition.

### Newport Snow

Analyte 1 – Fluorophore 9 – methyl- $\beta$ -cyclodextrin

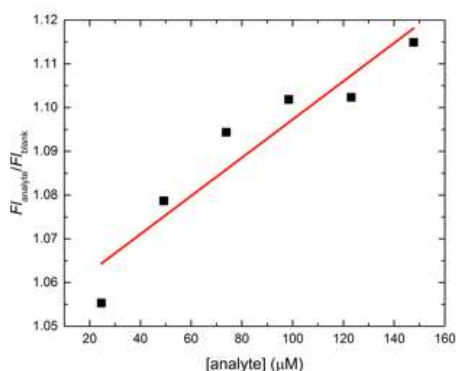

**Figure S33:** Limit of detection of analyte 1 with fluorophore 9 and methyl- $\beta$ -cyclodextrin in Newport snow

Analyte 2 – Fluorophore 9 – methyl- $\beta$ -cyclodextrin

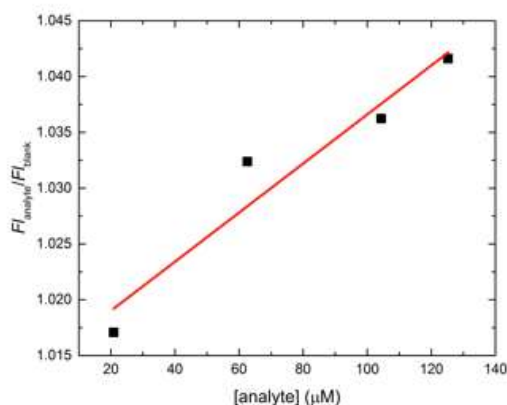

**Figure S34:** Limit of detection of analyte 2 with fluorophore 9 and methyl- $\beta$ -cyclodextrin in Newport snow

Analyte **3** – Fluorophore **9** – methyl- $\beta$ -cyclodextrin

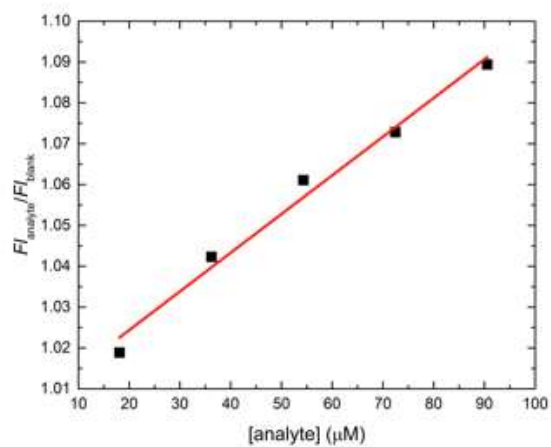

**Figure S35:** Limit of detection of analyte **3** with fluorophore **9** and methyl- $\beta$ -cyclodextrin in Newport snow

Analyte **4** – Fluorophore **9** – methyl- $\beta$ -cyclodextrin

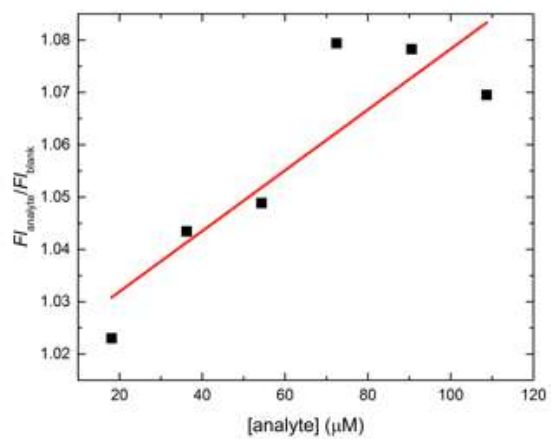

**Figure S36:** Limit of detection of analyte **4** with fluorophore **9** and methyl- $\beta$ -cyclodextrin in Newport snow

Analyte 5 – Fluorophore 9 – methyl- $\beta$ -cyclodextrin

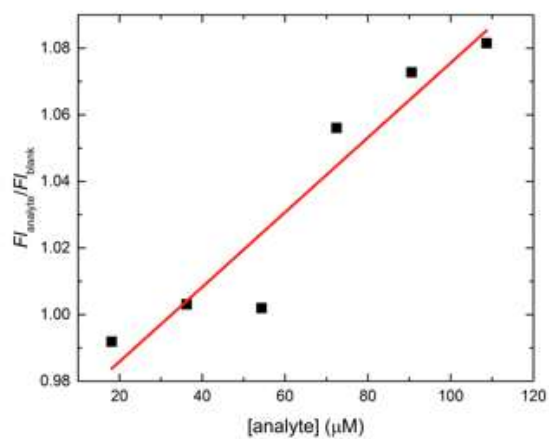

**Figure S37:** Limit of detection of analyte 5 with fluorophore 9 and methyl- $\beta$ -cyclodextrin in Newport snow

Analyte 6 – Fluorophore 9 – methyl- $\beta$ -cyclodextrin

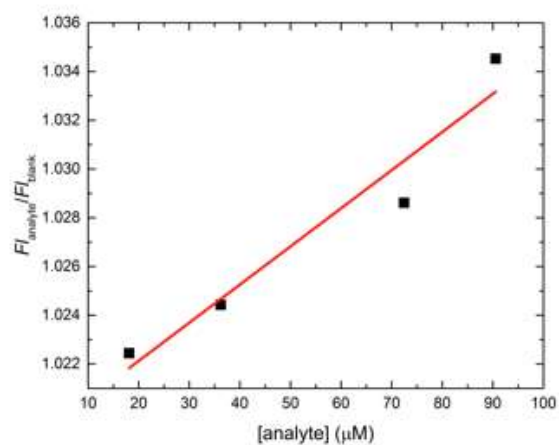

**Figure S38:** Limit of detection of analyte 6 with fluorophore 9 and methyl- $\beta$ -cyclodextrin in Newport snow

Analyte 7 – Fluorophore 9 – methyl- $\beta$ -cyclodextrin

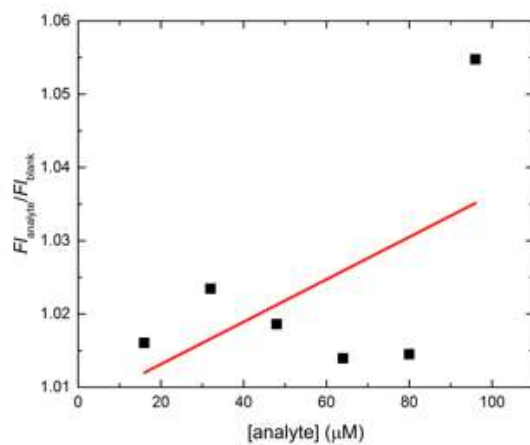

**Figure S39:** Limit of detection of analyte 7 with fluorophore 9 and methyl- $\beta$ -cyclodextrin in Newport snow

#### Providence Snow

Analyte 1 – Fluorophore 9 – methyl- $\beta$ -cyclodextrin

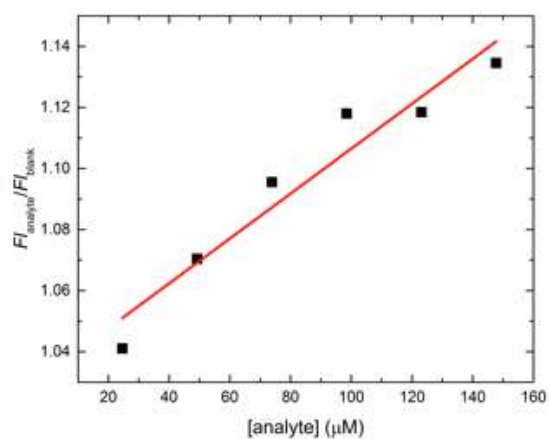

**Figure S40:** Limit of detection of analyte 1 with fluorophore 9 and methyl- $\beta$ -cyclodextrin in Providence snow

Analyte 2 – Fluorophore 9 – methyl- $\beta$ -cyclodextrin

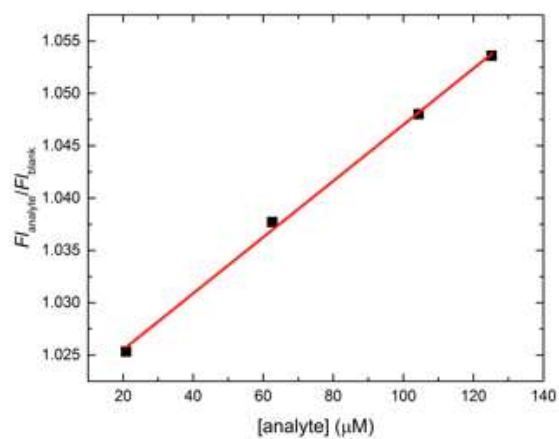

**Figure S41:** Limit of detection of analyte 2 with fluorophore 9 and methyl- $\beta$ -cyclodextrin in Providence snow

Analyte 3 – Fluorophore 9 – methyl- $\beta$ -cyclodextrin

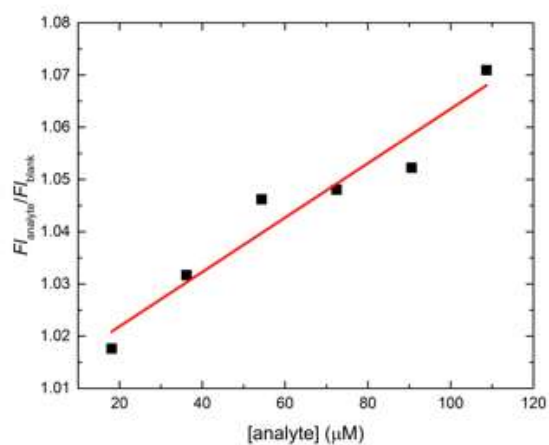

**Figure S42:** Limit of detection of analyte 3 with fluorophore 9 and methyl- $\beta$ -cyclodextrin in Providence snow

Analyte 4 – Fluorophore 9 – methyl- $\beta$ -cyclodextrin

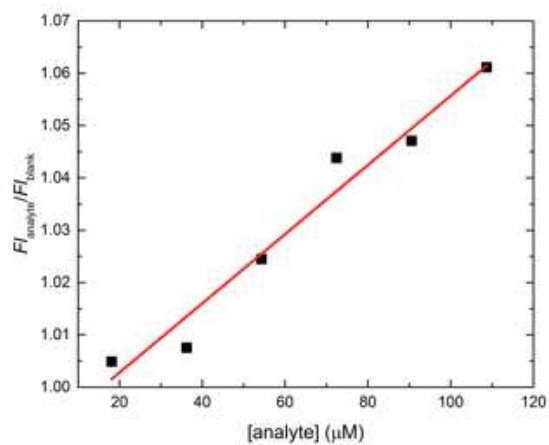

**Figure S43:** Limit of detection of analyte 4 with fluorophore 9 and methyl- $\beta$ -cyclodextrin in Providence snow

Analyte 5 – Fluorophore 9 – methyl- $\beta$ -cyclodextrin

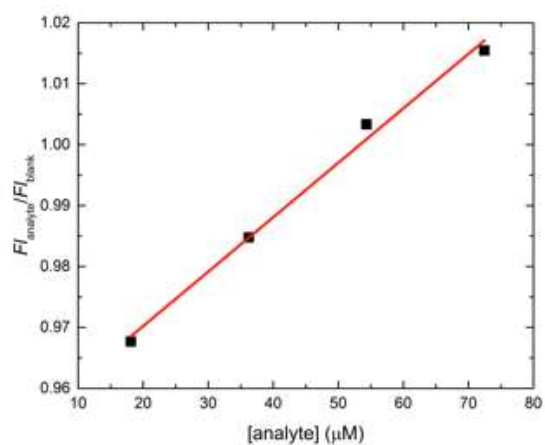

**Figure S44:** Limit of detection of analyte 5 with fluorophore 9 and methyl- $\beta$ -cyclodextrin in Providence snow



Analyte 6 – Fluorophore 9 – methyl- $\beta$ -cyclodextrin

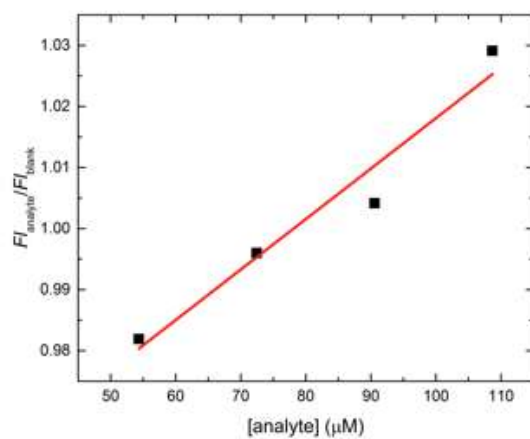

**Figure S45:** Limit of detection of analyte 6 with fluorophore 9 and methyl- $\beta$ -cyclodextrin in Providence snow

Analyte 7 – Fluorophore 9 – methyl- $\beta$ -cyclodextrin

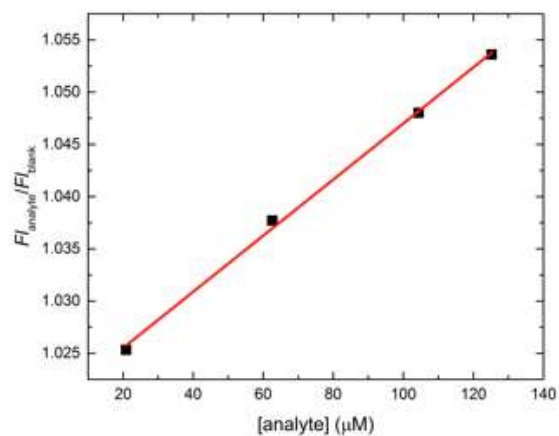

**Figure S46:** Limit of detection of analyte 7 with fluorophore 9 and methyl- $\beta$ -cyclodextrin in Providence snow

## Kingston Snow

Analyte 1 – Fluorophore 9 – methyl- $\beta$ -cyclodextrin

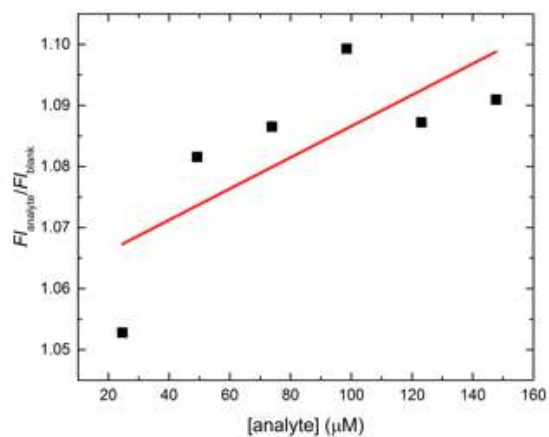

**Figure S47:** Limit of detection of analyte 1 with fluorophore 9 and methyl- $\beta$ -cyclodextrin in Kingston snow

Analyte 2 – Fluorophore 9 – methyl- $\beta$ -cyclodextrin

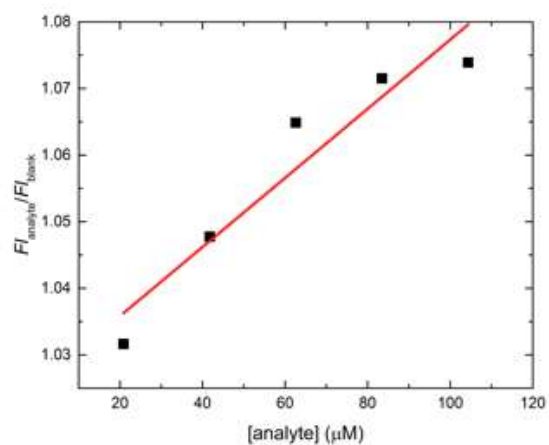

**Figure S48:** Limit of detection of analyte 2 with fluorophore 9 and methyl- $\beta$ -cyclodextrin in Kingston snow

Analyte **3** – Fluorophore **9** – methyl- $\beta$ -cyclodextrin

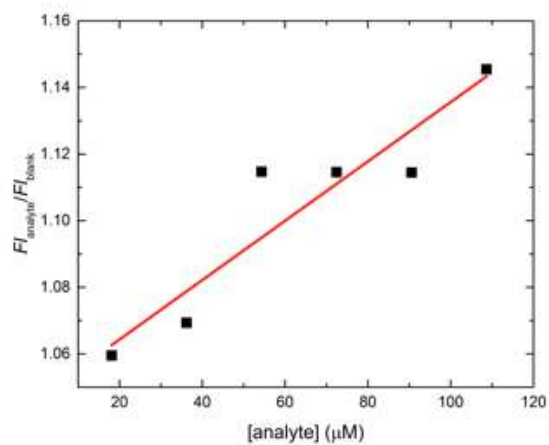

**Figure S49:** Limit of detection of analyte **3** with fluorophore **9** and methyl- $\beta$ -cyclodextrin in Kingston snow

Analyte **4** – Fluorophore **9** – methyl- $\beta$ -cyclodextrin

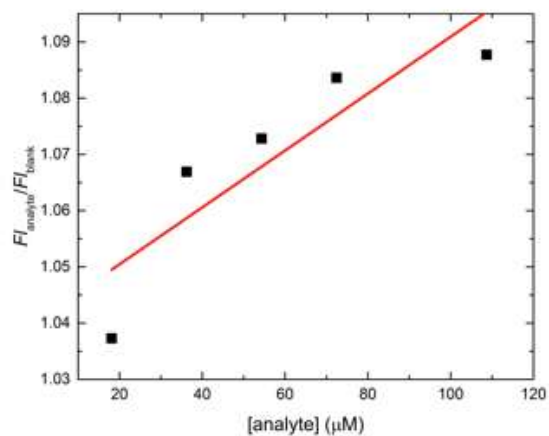

**Figure S50:** Limit of detection of analyte **4** with fluorophore **9** and methyl- $\beta$ -cyclodextrin in Kingston snow

Analyte 5 – Fluorophore 9 – methyl- $\beta$ -cyclodextrin

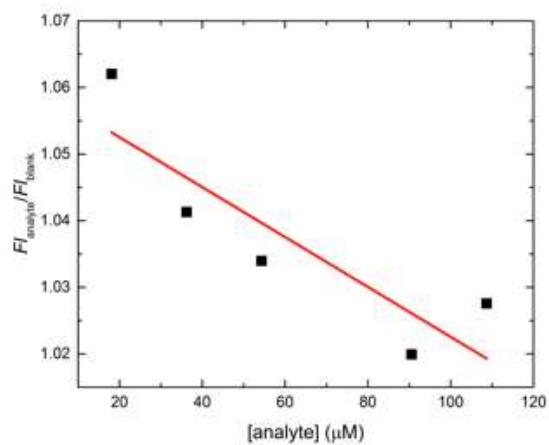

**Figure S51:** Limit of detection of analyte 5 with fluorophore 9 and methyl- $\beta$ -cyclodextrin in Kingston snow

Analyte 6 – Fluorophore 9 – methyl- $\beta$ -cyclodextrin

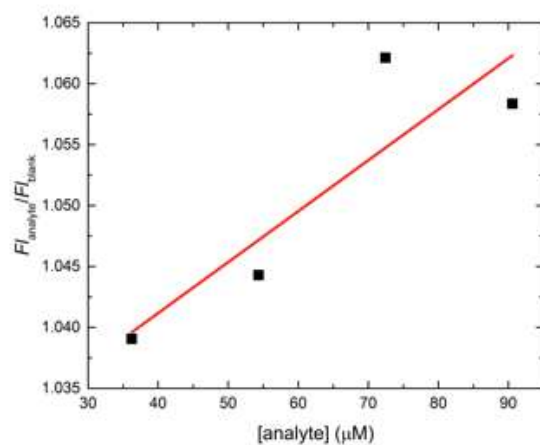

**Figure S52:** Limit of detection of analyte 6 with fluorophore 9 and methyl- $\beta$ -cyclodextrin in Kingston snow

Analyte 7 – Fluorophore 9 – methyl- $\beta$ -cyclodextrin

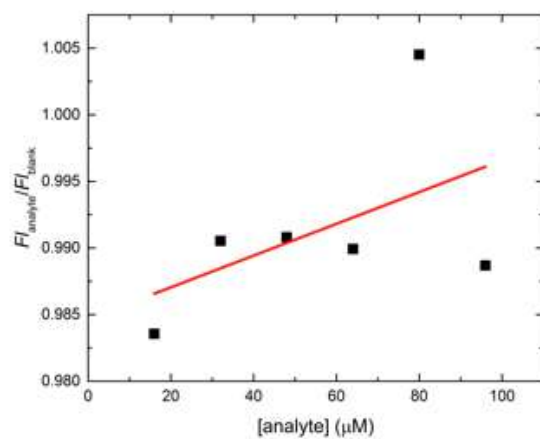

**Figure S53:** Limit of detection of analyte 7 with fluorophore 9 and methyl- $\beta$ -cyclodextrin in Kingston snow

#### SUMMARY FIGURES FOR ARRAY GENERATION EXPERIMENTS

##### Newport Snow

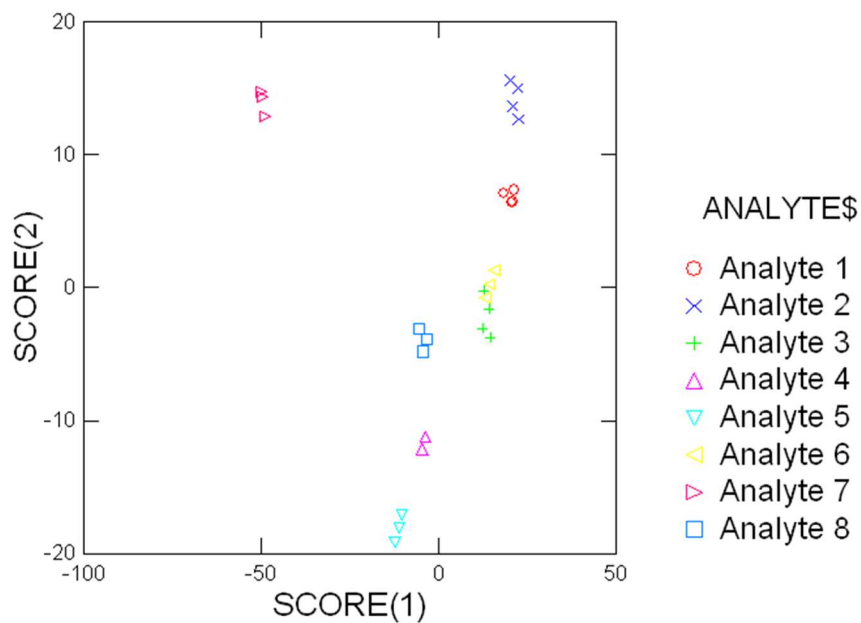

**Figure S54:** Linear discriminant analysis of fluorescence responses for analytes 1-8 with fluorophore 9 in Newport snow

##### Providence Snow

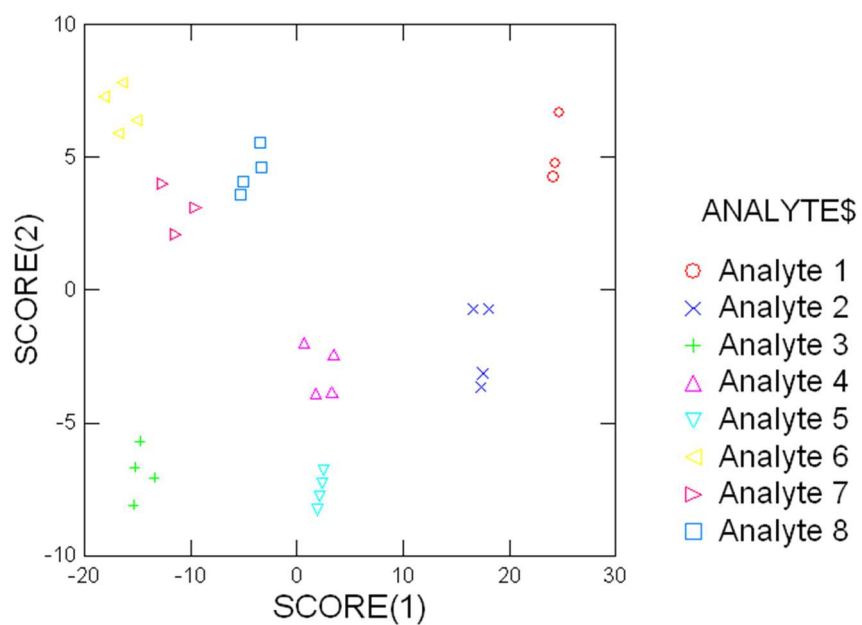

**Figure S55:** Linear discriminant analysis of fluorescence responses for analytes **1-8** with fluorophore **9** in Providence snow

## Kingston Snow

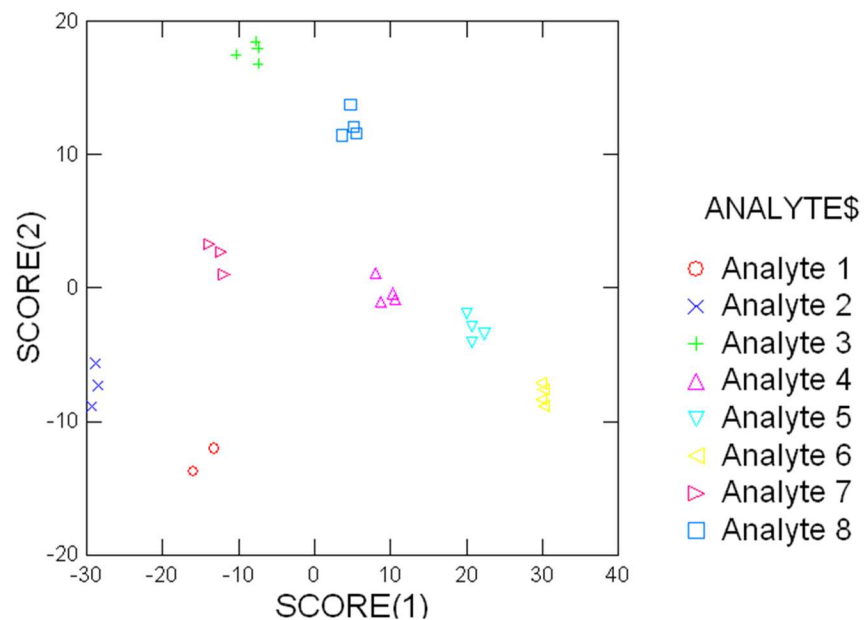

**Figure S56:** Linear discriminant analysis of fluorescence responses for analytes **1-8** with fluorophore **9** in Kingston snow

## DI Water

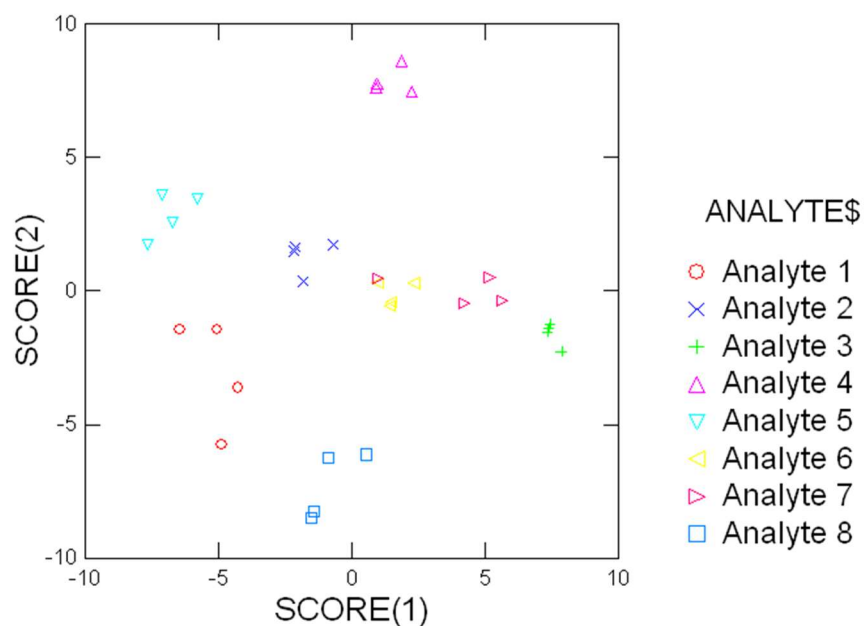

**Figure S57:** Linear discriminant analysis of fluorescence responses for analytes **1-8** with fluorophore **9** in DI water

## SUMMARY FIGURES FOR MIXTURE FLUORESCENCE MODULATION

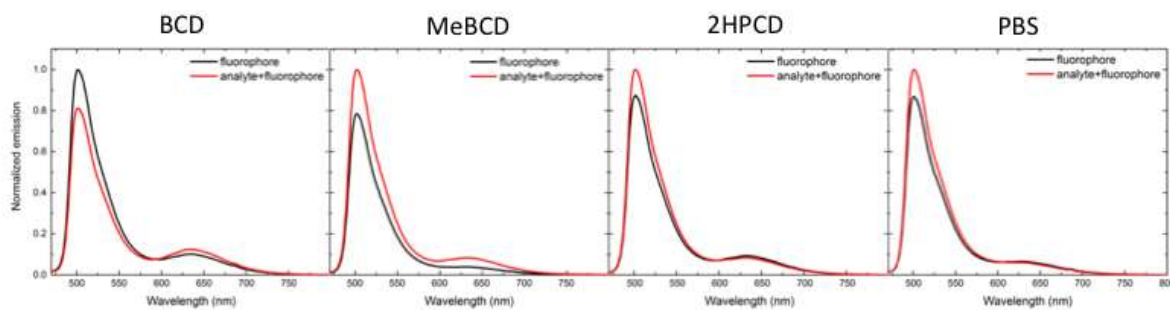

**Figure S58.** Fluorescence modulation of fluorophore **9** with 1:1 (vol:vol) analyte **4** and analyte **5** in Kingston snow

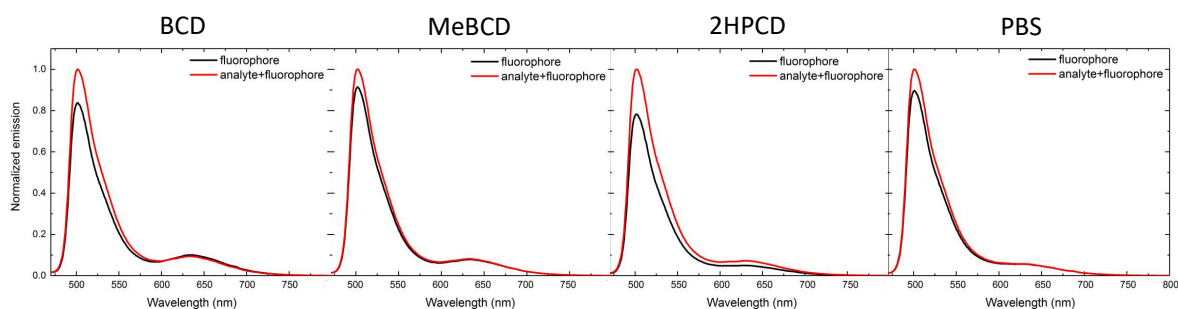

**Figure S59.** Fluorescence modulation of fluorophore **9** with 1:1 (vol:vol) analyte **4** and analyte **6** in Kingston snow

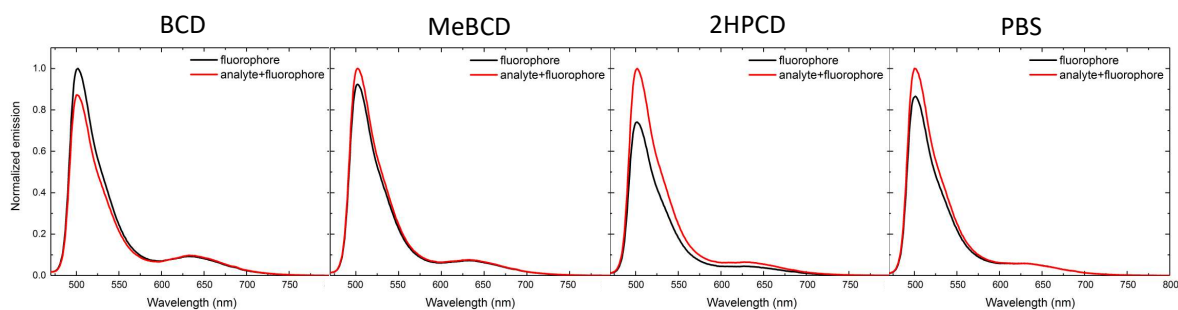

**Figure S60.** Fluorescence modulation of fluorophore **9** with 1:1 (vol:vol) analyte **5** and analyte **6** in Kingston snow



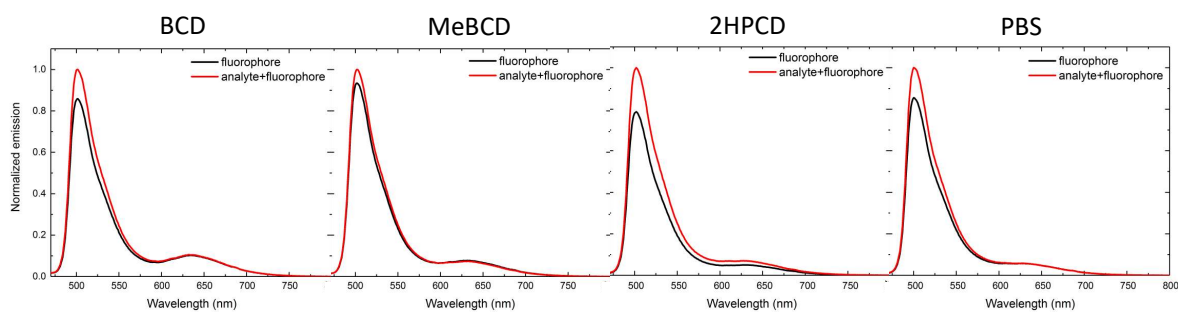

**Figure S61.** Fluorescence modulation of fluorophore **9** with 1:1:1 (vol:vol:vol) analyte **4**, analyte **5**, and analyte **6** in Kingston snow

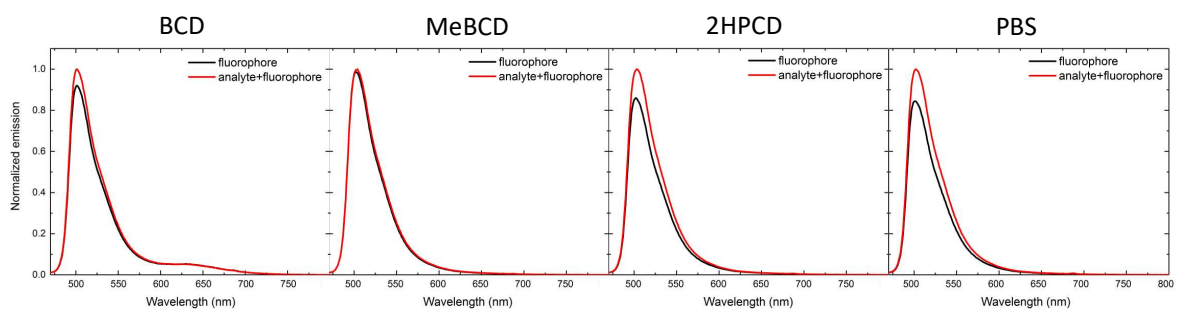

**Figure S62.** Fluorescence modulation of fluorophore **9** with 1:1 (vol:vol) analyte **4** and analyte **5** in DI water

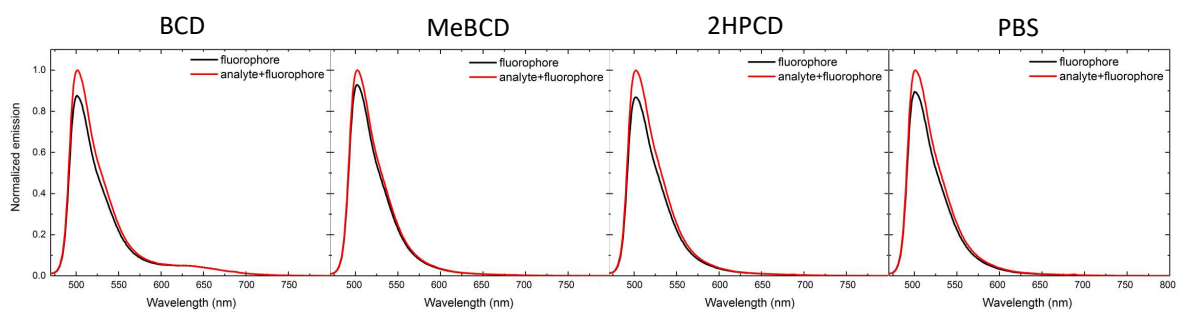

**Figure S63.** Fluorescence modulation of fluorophore **9** with 1:1 (vol:vol) analyte **4** and analyte **6** in DI water

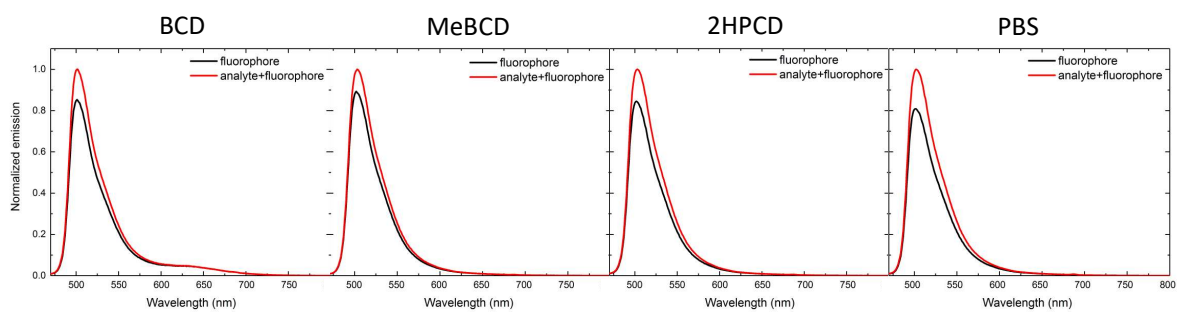

**Figure S64.** Fluorescence modulation of fluorophore **9** with 1:1 (vol:vol) analyte **5** and analyte **6** in DI water

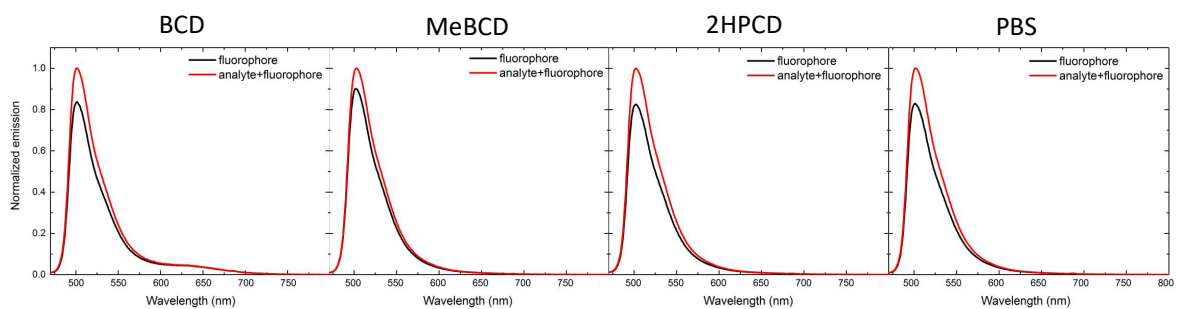

**Figure S65.** Fluorescence modulation of fluorophore **9** with 1:1:1 (vol:vol:vol) analyte **4**, analyte **5**, and analyte **6** in DI water
